# Protocol for a prospective, multicentre, cross-sectional cohort study to assess personal light exposure

Carolina Guidolin <sup>[1, 2]</sup>

Sam Aerts <sup>[3]</sup>

Gabriel Kwaku Agbeshie <sup>[4]</sup>

Kwadwo Owusu Akuffo <sup>[4]</sup>

Sema Nur Aydin <sup>[5]</sup>

David Baeza Moyano <sup>[6]</sup>

John Bolte <sup>[3, 7]</sup>

Kai Broszio <sup>[8]</sup>

Guadalupe Cantarero-García <sup>[6]</sup>

Altug Didikoglu <sup>[5]</sup>

Roberto Alonso González-Lezcano <sup>[6]</sup>

Hongli Joosten-Ma <sup>[3]</sup>

Sofia Melero-Tur <sup>[6]</sup>

Maria Nilsson Tengelin <sup>[9]</sup>

María Concepción Pérez Gutiérrez <sup>[6]</sup>

Oliver Stefani <sup>[10]</sup>

Ingemar Svensson <sup>[9]</sup>

Ljiljana Udovicic <sup>[8]</sup>

Johannes Zauner <sup>[2]</sup>

Manuel Spitschan <sup>[1, 2, 11] \*</sup>

1 Max Planck Institute for Biological Cybernetics, Max Planck Research Group Translational Sensory & Circadian Neuroscience

2 TUM School of Medicine and Health, Department Health and Sports Sciences, Chronobiology & Health, Technical University of Munich

3 Research Group Smart Sensor Systems, The Hague University of Applied Sciences

4 Department of Optometry and Visual Science, Kwame Nkrumah University of Science and Technology

5 Department of Neuroscience, Izmir Institute of Technology

6 Research Group ARIE, Department of Architecture and Design, Universidad San Pablo-CEU, CEU Universities

7 National Institute for Public Health and the Environment of the Netherlands (RIVM)

8 Federal Institute for Occupational Safety and Health (BAuA)

9 Department of Measurement Science and Technology, RISE Research Institutes of Sweden

10 Lucerne University of Applied Sciences and Arts

11 TUM Institute for Advanced Study (TUM-IAS), Technical University of Munich

\* Corresponding author: [manuel.spitschan@tum.de](mailto:manuel.spitschan@tum.de)

All authors except C.G. and M.S. listed in alphabetical order.

## 41 Author contributions

42 *Conceptualisation:* C.G., M.S.

43 *Data curation:* n/a

44 *Formal Analysis:* n/a

45 *Funding acquisition:* L.U., D.B.M., M.N.T., O.S., M.S.

46 *Investigation:* n/a

47 *Methodology:* C.G., L.U., K.B., D.B.M., S.M.-T., G.C-G., R.A.G.-L., S.A., J.B., H.J.-M., M.N.T., O.S.,  
48 A.D., J.Z., M.S.

49 *Project administration:* M.S.

50 *Resources:* n/a

51 *Software:* C.G., J.Z., M.S.

52 *Supervision:* n/a

53 *Validation:* n/a

54 *Visualisation:* C.G.

55 *Writing – original draft:* C.G., M.S.

56 *Writing – review & editing:* C.G., S.A., G.K.A., K.O.A., S.N.A., R.A.G.-L., D.B.M., J.B., K.B., G.C.-G.,  
57 A.D., H.J.-M., S.M.-T., M.N.T., M.C.P.G., O.S., I.S., L.U., J.Z., M.S.

## 58 Funding statement

59 The project (22NRM05 MeLiDos) has received funding from the European Partnership on Metrology,  
60 co-financed by the European Union's Horizon Europe Research and Innovation Programme and by  
61 the Participating States. Further funding is provided by the TUM Global Incentive Fund (GIF0000031)  
62 to support the collaboration between TUM and KNUST, and TÜBİTAK –The Scientific and  
63 Technological Research Council of Türkiye (Grant no. 224S740).

## 64 Abstract

65 Light profoundly impacts many aspects of human physiology and behaviour, including the  
66 synchronization of the circadian clock, the production of melatonin, and cognition. These effects of  
67 light, termed the non-visual effects of light, have been primarily investigated in laboratory settings,  
68 where light intensity, spectrum and timing can be carefully controlled to draw associations with  
69 physiological outcomes of interest. Recently, the increasing availability of wearable light loggers has  
70 opened the possibility of studying personal light exposure in free-living conditions where people  
71 engage in activities of daily living, yielding findings associating aspects of light exposure and health  
72 outcomes, supporting the importance of adequate light exposure at appropriate times for human  
73 health. However, comprehensive protocols capturing *environmental* (e.g., geographical location,  
74 season, climate, photoperiod) and *individual* factors (e.g., culture, personal habits, behaviour,  
75 commute type, profession) contributing to the measured light exposure are currently lacking. Here, we  
76 present a protocol that combines smartphone-based experience sampling (experience sampling  
77 implementing Karolinska Sleepiness Scale, KSS ratings) and high-quality light exposure data  
78 collection at three body sites (near-corneal plane between the two eyes mounted on spectacle, neck-  
79 worn pendant/badge, and wrist-worn watch-like design) to capture daily factors related to individuals'  
80 light exposure. We will implement the protocol in an international multi-centre study to investigate the  
81 environmental and socio-cultural factors influencing light exposure patterns in Germany, Ghana,  
82 Netherlands, Spain, Sweden, and Turkey (minimum n=15, target n=30 per site, minimum n=90, target  
83 n=180 across all sites). With the resulting dataset, lifestyle and context-specific factors that contribute  
84 to healthy light exposure will be identified. This information is essential in designing effective public  
85 health interventions.

## 86 Introduction

## 87 Background

88 Light exposure significantly affects human health and behaviour, modulating sleep, cognitive functions  
89 and neuroendocrine processes [1]. The effects of light on human physiology can be observed acutely  
90 as changes in subjective alertness, mood, sleep architecture, heart rate and suppression of the  
91 hormone melatonin, usually produced by the brain before the biological night [2], [3], [4], [5], [6].  
92 Furthermore, environmental light acts as the main “zeitgeber” (German for “time giver”) for our  
93 circadian system, synchronising endogenous physiological processes to the environmental 24-hour  
94 light-dark cycle so that bodily functions are temporally organised to match environmental stimuli [1].  
95 Human circadian rhythms have developed under the stable, naturally occurring 24-hour light-dark  
96 cycle, characterised by bright days and dark nights. However, in modern, industrialised societies, we  
97 often lack the “dark nights” and the “bright days” that our circadian rhythms adapted for, as individuals  
98 can effectively turn night into day with the use of electric light [7]. The advent of light emitting diode  
99 (LED) lamps, favourable for their affordable price and energy saving properties, together with the  
100 availability of emissive displays such as smartphones and laptops, has played an important role in  
101 increasing accessibility and use of electric light [8]. Furthermore, modern lifestyles are characterised  
102 by considerable amount of time spent indoors, with estimates reporting up to 90% of indoor time, thus  
103 implying insufficient exposure to daylight [9]. These aspects of the modern lifestyle and lighting  
104 landscape have caught particular attention from researchers, who are actively investigating the health  
105 consequences of aberrant light exposures.

106 Epidemiological studies have drawn associations between evening light exposure and breast cancer  
107 risk, leading to evening light together with insufficient daylight being classified as a human carcinogen  
108 [10]. Similarly, cross-sectional and prospective longitudinal studies have shown that presence of light  
109 in the sleep environment is linked to higher obesity risk, a known risk factor for cardiovascular disease  
110 [11], [12]. New evidence is also demonstrating the role of wrongly timed light exposure for the  
111 development of mood disorders [13].

112 Altogether, the current evidence highlights the need to promote healthy light exposure in public health  
113 agendas. Recently, Golombek and colleagues [14] have proposed the notion of “sleep capital”,  
114 defined as the compound social, economic and health gain derived, among other factors, by healthy  
115 light exposure, consisting of bright (day)light exposure during the day and lack of light at night. As the  
116 authors argue, investing in sleep capital by adopting interventions which include adjusting light  
117 exposure is necessary for a healthy and productive society and could have profound economic  
118 implications, such as increased productivity, cognitive performance, reduced accident rate, and better

119 overall brain health [14]. In terms of defining the appropriate levels of light exposure, recent efforts  
120 have been undertaken by an interdisciplinary expert group. Drawing together evidence from laboratory  
121 and field studies, Brown and colleagues [15] have provided a framework for understanding the  
122 appropriate light amounts for healthy, day-active individuals during daytime, evening, and nighttime  
123 hours to maintain optimal physiology and circadian health.

## 124 Measuring determinants of light exposure in the real-world

125 Given the existing recommendations for optimal light exposure, an important question to address is  
126 whether the real-world light exposure patterns experienced by an individual, known as their “spectral  
127 diet” [16] actually meet these recommendations, and if this is not the case, what are the daily  
128 behaviours and contexts hindering appropriate light exposure? Light exposure in free-living conditions  
129 can be measured using wearable devices, known as light loggers, that are worn in various positions  
130 on the body, including the wrist (e.g. as a wristwatch), chest (e.g. as a pendant or brooch), or eye level  
131 (e.g. on a pair of glasses) by study participants [17]. When worn continuously over time, these  
132 wearable devices approximate the retinal irradiance an individual receives daily. The melanopic retinal  
133 irradiance drives the physiological effects of light [18]. Light exposure patterns can yield light metrics,  
134 including time spent above a specific light threshold (time above threshold, TAT; [19]) and variability of  
135 light timing (mean light timing, MLiT; [20]), which can subsequently be linked to health outcomes of  
136 interest and compared to the recommended light levels [15], [18].

137 As wearable light loggers become more accessible, research on light exposure patterns in free-living  
138 conditions has surged [17]. Most of the literature, however, remains descriptive, linking light metrics to  
139 one or two health outcomes of interest, or showing that individuals indeed largely fail to meet the  
140 recommended light levels [21]. While highly informative, these investigations fail to capture the  
141 contextual and behavioural dimensions leading to a given light exposure pattern. As proposed by Biller  
142 and colleagues [22], an individual's light exposure profile ultimately depends on many factors,  
143 including environmental (geographical location, sunshine hours, climate, temperature and  
144 photoperiod), cultural (customs, festivities and norms) and behavioural (lifestyle choices such as  
145 commute type and profession, as well as individual preferences) ones, which together interact with the  
146 built environment (different window and glazing types, lighting design and architecture).

147 Importantly, while some determinants of daily light exposure are independent of the individual (e.g.  
148 type of lights present in one's office, type of windows and glazing), individuals can exert a level of  
149 control on their light exposure by actively seeking or avoiding behaviours which involve specific light  
150 exposure (e.g. having lunch break outside or inside) [23], [24]. Considering the growing evidence that  
151 well-timed light exposure is crucial to support human health, it is vital not only to describe the timing  
152 and quantities of light that individuals receive during the day but also to understand which contextual

153 and behavioural factors contribute to specific light exposure patterns. Once these have been  
154 identified, target behaviours and barriers that prevent optimal light exposure can be addressed by  
155 delivering precision behavioural health interventions in simple and accessible ways, such as using  
156 mobile apps and chatbots [22].

157 Here, we outline a comprehensive study protocol for field studies to collect rich and high-quality  
158 datasets comprising of light exposure data and its contextual and behavioural contributors. To obtain  
159 clean light exposure data from the light loggers, we describe in detail how to instruct participants and  
160 ensure their compliance with the protocol. Additionally, we present a questionnaire structure designed  
161 to capture daily factors linked to individual light exposure using a mobile app interface. Overall, this  
162 protocol provides a framework that researchers interested in collecting light exposure data can flexibly  
163 adjust. We will use this protocol to create a reference dataset that characterises individual light  
164 exposure over seven days at six different geographical locations in Europe and Africa. Our dataset will  
165 characterise light exposure and probe the suitability of light logging devices in different geographical  
166 and sociocultural contexts. This will help identify context- and lifestyle-specific factors associated with  
167 healthy light exposure patterns, which will serve as a first step to designing effective public health  
168 interventions.

## 169 Objectives

170 The three objectives of the study are

- 171 1. To characterise individuals' light exposure over seven days utilizing a near-corneal-plane light  
172 logger placed at the centre of non-prescription glasses frame, along with a light logger as a  
173 chest-worn pendant and a wrist-worn light logger;
- 174 2. To collect data across six countries (Germany, Ghana, Netherlands, Spain, Sweden, and  
175 Turkey); and
- 176 3. To investigate the correlations between personal light exposure, physiological variables such  
177 as chronotype and light sensitivity, and behavioural outcomes including exercise, mood, and  
178 alertness.

## 179 Methods and materials

### 180 Sample

#### 181 Geographical sites and research centres involved

182 The novelty of this study is that personal light exposure data will be collected across various  
183 geographical locations using the same, harmonised protocol. We aim to leverage the collaboration  
184 between the following research centres to collect data in six countries: Federal Institute for  
185 Occupational Safety and Health (BAuA) and Technical University of Munich (TUM) in Germany,  
186 Kwame Nkrumah University of Science and Technology (KNUST) in Ghana, The Hague University of  
187 Applied Sciences (THUAS) in the Netherlands, Fundación Universitaria San Pablo CEU (FUSP-CEU)  
188 in Spain, Research Institutes of Sweden (RISE) in Sweden, and the Izmir Institute of Technology  
189 (IZTECH) in Turkey. We believe that the diversity in culture, latitude, photoperiod, climate, built  
190 environment and, hence, light exposure behaviours between these six locations, will provide  
191 interesting insights for the objectives of this study.

#### 192 Participant recruitment

193 Participants will be recruited by self-selection through advertisements which will be posted at the local  
194 hubs as well as in local newsletters. Participants interested in the study will be directed to an online  
195 platform (Research Electronic Data Capture; REDCap) [25], [26] for the initial screening survey.  
196 Detailed information about the study and its aim will be provided during this screening step. Inclusion  
197 and exclusion criteria (**Table 1**) will be tested using a questionnaire on the same online platform. This  
198 questionnaire will also collect demographic data (age, sex, gender, native language(s) and  
199 occupational status). If eligible for the study, participants will then be contacted by the experimenters  
200 to agree on possible participation dates and discuss any further questions.

201 Furthermore, they will be sent a picture of what the light logger looks like and asked if they feel  
202 comfortable wearing them throughout the experimental week. They will also be informed about the  
203 availability of the researchers throughout the experiment in case of doubts or technical issues with the  
204 light logger. Participants will be compensated at the end of the study according to their compliance  
205 with the experimental procedure: for every day of wearing the light logger for at least 80% of their  
206 waking hours (as defined by the Munich Chronotype Questionnaire; MCTQ) [27], volunteers will  
207 receive financial compensation, such that those adhering to the whole duration of the experiment will  
208 receive more than those adhering, for example, to only four out of the seven experimental days. The  
209 rates of financial compensation will depend on each measurement site and local customs. Data

210 collection can terminate after reaching at least  $n=15$  per site, with a target of  $n=30$ . The researchers  
211 will terminate the study for an individual participant in case of technical issues which do not allow the  
212 experiment to continue, e.g., when the light logger is not working as expected.

## 213 Inclusion and exclusion criteria

214 Eligible participants will be selected according to the inclusion and exclusion criteria listed in **Table 1**.  
215 These include demographic as well as mental and physical health parameters. Individuals with  
216 corrected vision requiring prescription glasses during the experimental week will be excluded due to  
217 incompatibility with our light glasses. However, individuals with a) prescription lenses or b) prescription  
218 glasses but are able and willing to wear prescription contact lenses during the experimental week will  
219 be able to participate in our study. Individuals suffering from psychiatric or sleep disorders will be  
220 excluded from the study. Furthermore, intake of any drugs and/or medications known to influence  
221 photosensitivity will be considered a criterion for exclusion. Finally, only people based at or near (<60  
222 km) the local hubs of each geographical location during the weekdays (Monday to Friday) of the  
223 experiment will be accepted for this study to have similar environmental conditions across participants  
224 at each measurement hub. All criteria mentioned above for inclusion and exclusion will be assessed  
225 by self-report through REDCap [25], [26]. The eligibility criteria used here can be modified for studies  
226 in which the goal is to assess a different population.

## 227 Protocol

### 228 Study design

229 This experiment is an observational field study in which all participants at the six different sites will  
230 undergo the same experimental conditions and questionnaires. These are shown in **Table 2**.

### 231 Procedure

232 A schematic representation of the experimental procedure is illustrated in **Figure 1**. Eligible  
233 participants will start the experiment on a Monday with an in-person visit to the office or laboratory of  
234 the selected hub and finish the experiment on the following Monday. On the first Monday (day 1), they  
235 will receive a detailed explanation of the experiment and sign an informed consent document.  
236 Volunteers will then be provided with three wearable light loggers to be worn at the near-corneal  
237 plane, at the chest level and at the wrist. They will receive detailed instructions on using both devices  
238 correctly, including removing them when in contact with water and during contact sports. Participants  
239 will also install the MyCap app [28], which integrates with REDCap and is used to fill in daily



240 questionnaires and set alarms on their phones as reminders to complete the scheduled questionnaires  
241 on the app. Before leaving, participants will complete two questionnaires measuring circadian time and  
242 circadian preference (Munich Chronotype Questionnaire; MCTQ and Morning Eveningness  
243 Questionnaire; MEQ).

244 Participants will wear the three light loggers throughout the week during their daily activities.  
245 Participants will be instructed to log non-wear time as follows. When taking off the spectacle-mounted  
246 light logger during the day, they will press the event button on the device and place it in a black bag.  
247 They will then log this action in the “Wear log” on the MyCap app. Similarly, when putting the light  
248 logger back on, they will take it out of the black bag, press the event button, and log this action in the  
249 “Wear log” on the MyCap app. If the participants forget the black bag, they will be prompted to  
250 describe where they placed the light glasses instead. Before sleep, participants will place the  
251 spectacle-worn light logger facing upwards on a bedside table or flat surface near their bed. They will  
252 also log this action in the “Wear log”. In case participants exit the local area (defined as a 60 km radius  
253 from the local hub), they will describe where they are located at this time and report when they re-  
254 entered the local area on the “Wear log”. In case they forget to log an activity, participants are allowed  
255 to log any of the five possible “Wear log” events (“Light logger on”, “Light logger off”, “Light logger off  
256 before sleep”, “Exiting local area”, “Re-entering local area”) as “past events” which happened  
257 previously (see Appendix).

258 Every morning after waking up, participants will start wearing the light logger and log this in the “Wear  
259 log” on the MyCap app. They will also fill in a questionnaire regarding their sleep (Consensus Sleep  
260 Diary; CSD). Throughout the day, they will receive notifications at four scheduled times to fill in  
261 questionnaires regarding their current light conditions (modified Harvard Light Exposure Assessment  
262 Questionnaire; modified H-LEA), alertness (Karolinska Sleepiness Scale; KSS) and mood  
263 (MoodZoom). In the evening, participants will complete questionnaires about their light exposure and  
264 activities during the last 24 hours (modified H-LEA), wellbeing (WHO-5 Wellbeing Index; WHO-5) and  
265 exercise (custom questionnaire). Throughout the experiment, participants will also report their positive  
266 and negative experiences in the “Experience log” (see Appendix).

267 Participants will return to the local centre on the following Monday, one week after the experiment  
268 starts. On this day, they will return the devices and complete a retrospective questionnaire regarding  
269 their light exposure (Light Exposure Behaviour Assessment; LEBA), light sensitivity (Visual Light  
270 Sensitivity Questionnaire-8; VLSQ-8), and their sleep environment (Assessment of Sleep Environment  
271 questionnaire; ASE) during the seven days they participated in the study. Furthermore, they will  
272 complete open-ended questions about their opinions on the light logger device (see Appendix). After  
273 completing these questionnaires, participants will be reimbursed based on their compliance with the  
274 experiment. The devices will be charged, and the next set of participants will start the experiment later  
275 that day.

## 276 Measures

277 In this section, we provide detailed information on the objective and subjective health-related  
278 measures collected in this study and described in *Procedure*.

### 279 Objective health-related measures

#### 280 Personal light logging

281 To measure personal light exposure, we will deploy ActLumus light loggers (Condor Instruments, São  
282 Paulo, Brazil) worn by participants for one week. ActLumus light loggers contain ten spectral channels,  
283 the outputs of which are combined to estimate photopic and melanopic irradiance. Throughout the  
284 trial, participants will wear three light loggers:

- 285 1. To measure light centrally in the near-corneal plane, the light loggers will be placed on the  
286 frame of non-prescription glasses. A 3D-printed holder for the light loggers has been designed  
287 and attached to the bridge of the glasses frame, enabling the insertion and removal of the  
288 ActLumus devices.
- 289 2. To measure light on the chest, the light loggers will be clipped to clothing or worn as a  
290 pendant.
- 291 3. To measure light on the wrist, a conventional location, the light loggers will be worn with  
292 manufacturer-provided wrist bands.

293 The choice of having three light loggers instead of only one is a technical one. Currently, there is no  
294 “best practice” for which measurement level (eye, chest, or wrist) is most accurate, or whether the  
295 three are comparable. For this reason, we collect light exposure data at all three levels, with the intent  
296 of exploring how the measured illuminance compares between them. The sampling interval of each  
297 ActLumus light logger will be set to 10 seconds to achieve highly temporally resolved data, and the  
298 devices will never be turned off nor charged during the experimental week. Light exposure data for  
299 each participant will then be downloaded only upon the return of the devices on the final Monday (day  
300 8). The choice of light loggers used here can vary depending on the availability.

301 As the use of non-prescription glasses still requires the use of lenses without optical power, the  
302 transmittance properties of the lenses will be measured between 250 and 2500 nm.

#### 303 Activity measurement

304 One of the ActLumus light loggers will be worn on the wrist. The ActLumus measures movement  
305 through an integrated tri-axial accelerometer and is used in field studies such as ours to distinguish  
306 wake and sleep time. Participants will be instructed to keep the wrist-worn device on during the day  
307 and night and only remove it when in contact with water and during contact sports.

## 308 Physiological, behavioural and contextual determinants of personal light 309 exposure

310 To understand which physiological, behavioural and contextual factors contribute to participants'  
311 objectively measured light exposure, we will collect a variety of subjectively reported health-related  
312 measures that can provide insights into subjects' daily activities and environments. This information  
313 will be collected at study intake, throughout the study or at discharge in the form of questionnaires  
314 through the REDCap/MyCap interface, as described in *Procedure* (refer to **Figure 1** for the frequency  
315 and timing of each measurement).

### 316 Physiological measures

#### 317 Chronotype questionnaires

318 On the first day of the experiment, participants will complete two questionnaires measuring circadian  
319 time and circadian preference: the Munich Chronotype Questionnaire (MCTQ, [27]) and the Morning-  
320 Eveningness Questionnaire (MEQ, [29]). The MCTQ is used to assess circadian time using questions  
321 about their sleep and wake habits during work and free days and commute type. The MEQ is used to  
322 determine the circadian preference of individuals to perform certain activities at specific times of the  
323 day.

#### 324 Visual Light Sensitivity Questionnaire-8 (VLSQ-8)

325 Participants complete the 8-point Visual Light Sensitivity Questionnaire-8 (VLSQ-8; [30]) at study  
326 discharge to answer questions about their visual light sensitivity during the experimental week. The  
327 questions include aspects of frequency and severity of photosensitivity as well as impacts of  
328 photosensitivity on daily behaviours, and participants answer using a 5-point Likert scale (1 = "Never"  
329 to 5 = "Always").

### 330 Behavioural measures

#### 331 Morning sleep log

332 Every morning after waking up, participants fill in the core Consensus Sleep Diary [31] consisting of 9  
333 items to assess their sleep timing, sleep duration during the night, and subjective sleep quality. This  
334 last item is scored on a five-point Likert scale (1 = "Very poor" to 5 = "Very good").

#### 335 Ecological momentary assessment ("Current conditions")

336 Four times a day (at 11:00, 14:00, 17:00 and 20:00), participants fill in a questionnaire concerning their  
337 current light conditions, mood and sleepiness. The researcher sends a reminder message through the

338 REDCap/MyCap messaging channel, and phone alarms set by participants at these times serve to  
339 ensure compliance. Firstly, current light conditions are tested through a multiple-choice question,  
340 where participants can choose one of 8 possible light scenarios as the “main light source” and, if  
341 applicable, as the “secondary light source”. The potential light sources to choose from consist of the  
342 same categories listed in the modified Harvard Light Exposure Assessment diary, which participants  
343 fill in every evening (see "Light exposure and activity diary", H-LEA; [32]). Secondly, a modified  
344 MoodZoom questionnaire [33] assesses current mood. Lastly, sleepiness is assessed using the  
345 Karolinska Sleepiness Scale (KSS; [34]) on a 10-point Likert scale ranging from 1 = “Extremely alert”  
346 to 10 = “Extremely sleepy, fighting sleep”.

#### 347 Exercise log

348 Every evening before sleep, participants complete a custom-made questionnaire about the exercise  
349 they performed during the day. This questionnaire was designed to assess intensity  
350 (vigorous/moderate/light, lack of exercise) and location (indoors/outdoors) of exercise, as well as  
351 sedentary time (“How much time did you spend sitting or reclining?”).

#### 352 Wellbeing log

353 Every evening before sleep, participants complete a modified version of the WHO-5 Wellbeing Index  
354 [35], consisting of 5 statements (1 = “I have felt cheerful and in good spirits”, 2 = “I have felt calm and  
355 relaxed”, 3 = “I have felt active and vigorous”, 4 = “How would you rate the quality of your sleep last  
356 night?”, and 5 = “My daily life has been filled with things that interest me”). Participants have to  
357 express agreement using a 5-point Likert scale ranging from 0 = “At no time” to 5 = “All of the time”  
358 (for statements 1, 2, 3 and 5) and from 1 = “Very poor” to 5 = “Very good” for statement 4.

#### 359 Worktime log

360 Every evening before sleep, participants complete a custom-made questionnaire on the clock times  
361 they went to their workplace, how, and when they returned home.

#### 362 Light exposure and activity log

363 Every evening, participants have to fill in a modified version of the Harvard Light Exposure  
364 Assessment (H-LEA; [32]). This is referred to as “mH-LEA” and is done on paper using a form  
365 provided by the experimenter during the in-person visit (see Appendix). Participants are asked to  
366 report, for each hour of the day, the primary light source they are exposed to and the activity they  
367 performed in that hour. The primary light source is described as “the biggest and brightest light  
368 source”. They can choose between 8 light categories (“Electric light source indoors (e.g., lamps such  
369 as LEDs)”, “Electric light source outdoors (e.g., street lights)”, “Daylight indoors (through windows)”,

370 "Daylight outdoors (including being in the shade)", "Emissive displays (e.g., smartphone, laptop etc.)",  
371 "Darkness (outdoors and/or indoors)", "Light entering from outside during sleep (e.g., daylight, street  
372 lights etc.)". If they believe they are exposed to a combination of lights within the same hour, they can  
373 choose from a list of possible combinations. With regards to their activity, they could choose between  
374 8 categories ("Sleeping in bed", "Awake at home", "On the road with public transport/car", "On the road  
375 with bike/on foot", "Working in the office/from home", "Working outdoors (including lunch break  
376 outdoors)", "Free time outdoors (e.g. garden/park etc.), "Other: please specify (e.g. sport)". To ensure  
377 that participants complete this task, they send a picture of the completed form every night and upload  
378 it to a shared folder (separate for each participant) where the experimenter could check compliance.  
379 Furthermore, they are asked to rate the confidence in their answers on MyCap, where they can  
380 answer using a 5-point Likert scale ranging from 1 = "Not confident at all" to 5 = "Completely  
381 confident".

#### 382 Light Exposure Behaviour Assessment (LEBA)

383 The 22-item Light Exposure Behaviour Assessment (LEBA; [23]) is used to retrospectively assess  
384 individuals' light behaviours during the experimental week at study discharge. Since the first three  
385 items of this instrument ask questions related to wearing blue-filtering, orange-tinted and/or red-tinted  
386 glasses, which do not apply to our participants due to the presence of the light logger device, these  
387 items are eliminated. The final questionnaire thus comprises the remaining 19 items. These concern  
388 specific behaviours such as exposure to daylight, smartphone use, light-related bedtime habits and  
389 electric light use at home. Participants can express the frequency of such behaviours using a 5-point  
390 Likert scale ranging from 1 = "Never" to 5 = "Always".

#### 391 Contextual measures

##### 392 Assessment of Sleep Environment (ASE) questionnaire

393 The 13-item Assessment of Sleep Environment (ASE) questionnaire is used to ask participants about  
394 aspects such as light, noise, temperature and humidity in their sleeping environment [36], which might  
395 affect their sleeping quality as well as the light measured by the light logger placed next to participants  
396 during sleep (e.g., in case of light coming through windows during sleep). Participants can express  
397 their agreement to each item using a 5-point Likert scale (1 = "Strongly agree" to 5 = "Strongly  
398 disagree").

##### 399 Environmental light logging

400 To measure the environmental light in the local site during each experimental week, one ActLumus  
401 light logger will optionally be placed on the rooftop of a chosen building. The set-up for these

402 environmental light measurements consists of a black metal floor, where the device lies horizontally,  
403 covered by a plastic half-dome to minimise light scattering while ensuring protection from the  
404 elements. This set-up is placed on the rooftop before participants start the study every week and  
405 remains there for the entire week until participants discharge, measuring environmental light with a  
406 sampling interval of 30 seconds. Each day, a researcher will check and, if necessary, clean the  
407 outside and/or the inside of the set-up from dirt or rain. At the end of each experimental week, the data  
408 from this environmental light logger will be downloaded, and the device will be charged before being  
409 placed back on the rooftop just before the next participants start the study on the same day. When  
410 such measurements are impossible, secondary data sources, including historical weather data,  
411 sunshine duration, sunrise/sunset times, or existing radiation measurement infrastructure, will be  
412 used.

### 413 Translation and adaptation of questionnaires

414 To run the study in our five sites, translation of surveys and questionnaires is required. To this end, a  
415 team-based, multi-step process will be employed to achieve this goal, involving a diverse group of  
416 individuals, including trained translators and experts in the survey's subject matter (based on the  
417 “TRAPD” approach to translate questionnaires). The source language is English and the target  
418 languages are German (Germany), Dutch (Netherlands), Swedish (Sweden), Spanish (Spain) and  
419 Turkish (Turkey). In Ghana, the original English version is used. A detailed description of the strategy  
420 used to translate the questionnaires is reported in the Appendix.

### 421 Trial feasibility

422 The current protocol was **trialled** in an independent data collection effort taking place from August to November  
423 2023 in Tübingen, Germany. A total of 26 participants (14 female; mean age $\pm$ 1SD: 28.0 $\pm$ 5.2) worn a corneal-plane  
424 light logger (ActLumus) and a wrist-worn actigraphy and light logger (ActTrust2) for a week (Monday to Monday),  
425 and completed the same subjective health-related measures described in the current protocol. The protocol was  
426 found to be largely feasible, and feedback from the participants was taken on in refining the protocol presented here.  
427 Furthermore, successful strategies for ensuring data quality throughout the experiment as well as during data  
428 analysis were documented and will be implemented in the current protocol. This will ensure a standardised data  
429 curation and analysis approach across the six geographical locations. The data collected in this independent data  
430 collection campaign will be published independently of this protocol.

## 431 Statistical analysis

### 432 Power analysis

433 A sample size calculation based on power analysis was performed based on a framework described  
434 elsewhere [37]. The calculation was based on a historical dataset [38] provided by one of the  
435 geographical locations (Germany: BAuA); where participants measured light exposure for multiple  
436 days in winter, spring, and summer with devices attached to clothing at chest height. A suitable subset  
437 of this data was used to calculate the necessary sample size to reach a power of 0.8 across common  
438 light exposure metrics when comparing them between winter and summer seasons. While the  
439 experiment producing the historical data deviates somewhat from the current study's experimental  
440 structure, it still allows for a realistic comparison of metrics between different environmental conditions  
441 while considering intra-individual variability. The sample size calculation is based on a bootstrap  
442 resampling of daily metrics between winter and summer. For each resampled dataset, significance  
443 was tested in a mixed-effect model (fixed effect: season, random effect: participants) with a  
444 significance level of 0.05. The fraction of significant differences was compared against the power level  
445 threshold of 0.8. The required sample size is the minimum sample size that reaches this threshold,  
446 with 1000 resamples per sample size (sample sizes from 3 to 50 were tested). A total of twelve  
447 metrics were analyzed:

- 448 • Geometric mean of melanopic EDI (lx)
- 449 • Geometric standard deviation of melanopic EDI (lx)
- 450 • Luminous exposure (lx\*h)
- 451 • Time above 250 lux (h)
- 452 • Time above 1000 lux (h)
- 453 • Mean timing of light above 250 lux (h)
- 454 • Mean timing of light below 10 lux (h)
- 455 • Intradaily variability
- 456 • Mean across the darkest (L5) hours (lx)
- 457 • Midpoint of the darkest (L5) hours (lx)
- 458 • Mean across brightest (M10) hours (lx)
- 459 • Midpoint of the brightest (M10) hours (lx)

460 Three metrics had no effect in the historical dataset and thus did not reach the power threshold  
461 (Geometric standard deviation, mean timing of light above 250 lux, midpoint of darkest 5 hours). With  
462 a sample size of 15 participants, eight out of nine metrics showed sufficient power (intradaily  
463 variability: 21 participants to threshold power). Even considering a high dropout rate of 33% leaves

464 seven out of nine metrics sufficiently powered (mean of darkest 5 hours: 15 participants to threshold  
465 power).

## 466 Pre-processing

467 Objectively measured light exposure data will be log-transformed (base 10) to account for large light  
468 level differences, such as indoor and outdoor light exposure.

469 Data from the light logger will be processed to separate non-wear time from wear time. For this  
470 purpose, the Wear log will be considered the “ground truth” in terms of detection of non-wear time.

471 Once confirmed by visual inspection, non-wear times of  $\geq 5$  minutes will be removed.

472 We will apply stringent exclusion criteria for our confirmatory tests (see Confirmatory analysis). We will  
473 exclude the following missing data in hourly analyses:

- 474 • Missing entry on the modified H-LEA for a given hour during waking hours: if no category has  
475 been selected for a given waking hour (waking hours as specified in the sleep log of the  
476 corresponding day);
- 477 • Non-wear times of 50% for a given hour.

478 Furthermore, we will exclude an individual day from the analysis if 20% of the objective light exposure  
479 data from a participant's waking hours (specified in the MCTQ) is missing. This does not apply to the  
480 first and last experimental days, as these are not “complete” days (participants will receive and return  
481 the light logger throughout the day).

482 When data have been excluded from confirmatory analyses, we may include them in future  
483 exploratory analyses.

## 484 Statistical analysis and pre-processing

485 We plan to analyse all data with the R software and the package LightLogR  
486 (<https://tscnlab.github.io/LightLogR/index.html>) which provides a workflow for the processing,  
487 visualization and metrics calculation based on wearable light logger data. If not otherwise specified  
488 below, the planned method for statistical analysis is through (linear) mixed-effect models implemented  
489 with the lme4 package [39]. Equations follow the notation used by the package. p-values obtained by  
490 likelihood-ratio tests of the full model with the effect in question, against the model without the effect.  
491 p-values less than or equal to 0.05 will be considered significant. p-value adjustment for multiple tests  
492 within each hypothesis is planned using Benjamini and Hochberg's *false discovery rate* (FDR) method  
493 [40].

## 494 Confirmatory analysis

495 We plan to perform the three following confirmatory analyses:



- 496 1. H1: We hypothesize that there is a significant relationship between hourly self-reported light  
497 exposure categories and hourly median objective light exposure.
- 498 a. Preparation: Hourly entry on light sources from daily modified H-LEA will serve as  
499 categorical variables. In the case of two light sources for a given hour, only the primary  
500 light source will be considered (as reported by participants). The median melanopic  
501 equivalent daylight illuminance (melanopic equivalent daylight illuminance; mEDI) as  
502 measured objectively by the light logger for the corresponding hour will be calculated.
- 503 b. Analysis: mel EDI is used as the dependent variable, and H-LEA as the fixed effect,  
504 participants within each geolocation as random effect. Participant's geolocation, sex,  
505 age, occupational status and chronotype (MCTQ) are added as covariates. The  
506 dependency of mel EDI and H-LEA as well as the weekday is allowed to vary between  
507 participants within a geolocation. The resulting formula is as follows:
- 508 
$$E(\widetilde{\text{mel EDI}}) = \text{H-LEA} + \text{geolocation} + \text{weekday} + \text{sex} + \text{age} + \text{occupational status} +$$
  
509 
$$\text{chronotype} + (1 + \text{H-LEA} + \text{weekday} \mid \text{geolocation:participant}) \quad (1)$$
- 510 2. H2: We hypothesize that MCTQ-measured chronotype  $\text{MSF}_{\text{sc}}$  (mid-sleep on free days corrected  
511 for sleep debt on weekdays) and  $\text{MLiT}^{250 \text{ lx mEDI}}$  (mean light timing >250 lx melanopic EDI) are  
512 correlated, such that earlier chronotypes receive light earlier in the day.
- 513 a. Preparation: calculate MCTQ-derived  $\text{MSF}_{\text{sc}}$  for each participant and calculate  $\text{MLiT}^{250 \text{ lx}}$   
514  $\text{mEDI}$  as average clock time of all data points >250 lx mEDI over the six measurement  
515 days for each participant.
- 516 b. Analysis: Spearman's rank correlation coefficient between  $\text{MSF}_{\text{sc}}$  and 6-day average  
517  $\text{MLiT}^{250 \text{ lx mEDI}}$  for each participant. Additional models with various ring-fenced covariates  
518 will be built in future steps.
- 519 3. H3: We hypothesize that there is a significant difference between daily average objective light  
520 exposure and geographical location, and additionally, that the differences in photoperiod explain  
521 a substantial part of that relationship
- 522 a. Preparation: calculate the daily mel EDI light dose (in lx\*h) as measured objectively by  
523 the light logger for the corresponding day. Calculate also the photoperiod of that day for  
524 a given location as the time from sunrise until sunset (sun elevation equal to zero), as  
525 calculated by the sun angles given from the *oce R* package [41].
- 526 b. Analysis: daily mel EDI light dose (in lx\*h) is the dependent continuous variable.  
527 Geolocation is the independent categorical variable. A second step also includes  
528 photoperiod. Weekday, sex, age, and chronotype are covariates. Participant ID within  
529 geolocation is a random effect, as is the weekday effect for each participant. The full  
530 formula is as follows:

531  $E(\text{Light Dose}) = \text{geolocation} + \text{photoperiod} + \text{weekday} + \text{sex} + \text{age} + \text{chronotype} +$   
532  $(1 + \text{weekday} | \text{geolocation} : \text{participant}) (2)$

## 533 Exploratory analyses

534 We plan to explore several relationships regarding physiological, behavioural, and contextual self-  
535 reported data. These are listed here for transparency.

### 536 1. Light exposure

537 1.1. Relationship between metrics of light exposure that describe light properties (melanopic EDI  
538 and photopic illuminance) and between metrics describing the temporal pattern of light  
539 exposure, including light regularity index (LRI), intraday variability (IV), interday stability (IS).

540 1.2. Comparison between objectively measured personal light exposure during weekdays and  
541 weekends.

542 1.3. Relationship between retrospective light exposure items as measured by the LEBA  
543 instrument and objective light exposure.

544 1.4. Relationship between environmental conditions during the experimental week (e.g.  
545 photoperiod availability, sunlight hours and temperature) and objective personal light  
546 exposure.

547 1.5. Relationship between objective personal light exposure measured and mood and alertness  
548 ratings measured throughout the day.

549 1.6. Relationship between subjective light sensitivity as reported by the VLSQ-8 and objective  
550 personal light exposure.

551 1.7. Relationship between daily objective personal light exposure and wellbeing scores as  
552 measured by the WHO-5 questionnaire.

553 1.8. Relationship between exercise frequency and type as measured by the exercise log and  
554 objective personal light exposure.

555 1.9. Relationship between geolocation, photoperiod and other metrics of light exposure (see 1.1),  
556 also in interaction with the weekday.

### 557 2. Light logger acceptability:

558 2.1. Descriptive analysis of open-ended questions on wearing the light logger.

559 2.2. Relationship between negative and positive experiences as reported in the experience log  
560 and non-wear time as reported in the wear log.

## 561 Data storage and privacy

562 Data collected through REDCap and MyCap will be pseudonymized in the system and stored on this  
563 system until the end of data analysis. Anonymised data will be made publicly available after the  
564 publication of the primary research publication.

## 565 Outcome measures

### 566 Primary outcome measures

567 Our primary outcome measures are listed in **Table 3**. They include objectively measured daily light  
568 exposure (examined in H1 and H3) and chronotype (examined in H2).

### 569 Secondary outcome measures

570 Our secondary outcome measures will be described using summary statistics and explored in  
571 exploratory analyses. Specifically, we will explore the relationship between objectively measured  
572 personal light exposure, physiological variables (chronotype and light sensitivity), behavioural  
573 variables (such as exercise, mood, and alertness) and contextual variables (sleep environment).

## 574 Code, data and materials availability

575 Upon conclusion of the primary analyses, the data will be made available under the Creative  
576 Commons license (CC-BY) with no reservations in the supplementary material of the research  
577 publication and/or on a public repository (e.g., FigShare).

## 578 Additional files

579 GuidolinEtAl\_2024\_Appendix.pdf: Supplementary document containing additional information on data  
580 collection, and translation/adaptation of questionnaires used in the study.

## 581 Ethics approval

582 This research protocol was reviewed and approved by the Medical Ethics Committee of the Technical  
583 University of Munich (2023-115-S-KK).

## 584 Conflicts of interest

585 The authors declare that the study will be conducted without any financial or commercial relationships  
586 that could be explained as a conflict of interest.

587

# Figures

588

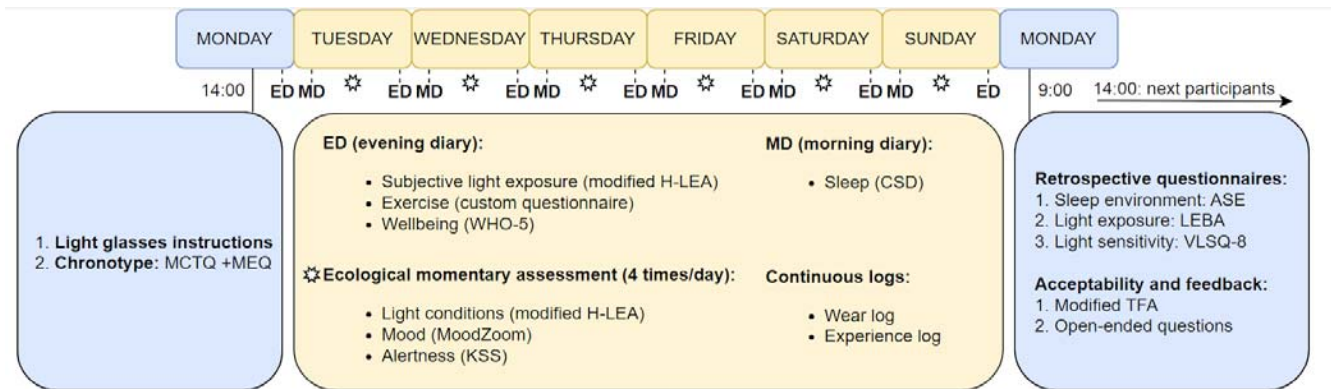

589

590

Figure 1: Schematic representation of the experimental timeline of the experiment (Monday to

591

Monday).

592

## Tables

593

| Aspect                                   | Assessment modality | Exclusion criterion and cut-off                                                                | Timing of Screening      |
|------------------------------------------|---------------------|------------------------------------------------------------------------------------------------|--------------------------|
| <b>Age</b>                               | Self-report         | <18 years<br>>65 years                                                                         | Initial screening survey |
| <b>Psychiatric and sleep disorders</b>   | Self-report         | Presence of any                                                                                | Initial screening survey |
| <b>Tobacco and recreational drug use</b> | Self-report         | Regular use (1/week or more)                                                                   | Initial screening survey |
| <b>Medication intake</b>                 | Self-report         | Presence of any known to influence photosensitivity                                            | Initial screening survey |
| <b>Visual acuity</b>                     | Self-report         | Requirement of prescription glasses during the experimental week                               | Initial screening survey |
| <b>Normal vision</b>                     | Self-report         | History of ocular or retinal diseases, colour blindness                                        | Initial screening survey |
| <b>Location during experimental week</b> | Self-report         | Exiting local hubs ( $\geq 60$ km) during weekdays (Monday to Friday) of the experimental week | Initial screening survey |
| <b>Shift work</b>                        | Self-report         | Shiftwork in the past two months                                                               | Initial screening survey |
| <b>Parenthood</b>                        | Self-report         | Parent of a child <1 year old                                                                  | Initial screening survey |
| <b>Full-time employment</b>              | Self-report         | Unemployment, leave, working part-time (<80%), studying                                        | Initial screening survey |

594

**Table 1:** Inclusion and exclusion criteria.

It is made available under a [CC-BY 4.0 International license](#) .

| Read-out                                               | Measurement modality                                                                                                 | Sampling frequency                 | Timing of sampling     | N per participant |
|--------------------------------------------------------|----------------------------------------------------------------------------------------------------------------------|------------------------------------|------------------------|-------------------|
| <b>Objective individual light exposure</b>             | Light logger                                                                                                         | Continuous measurement over 7 days | Every 10 seconds       | Approx. 10080     |
| <b>Objective activity/rest</b>                         | Actimeter                                                                                                            | Continuous measurement over 7 days | Every 10 seconds       | Approx. 10080     |
| <b>Chronotype</b>                                      | Munich Chronotype Questionnaire (MCTQ, circadian time) and Morning Evening Questionnaire (MEQ, circadian preference) | 1 measurement over 7 days          | First experimental day | 1                 |
| <b>Subjective sleep</b>                                | Consensus Sleep Diary (CSD)                                                                                          | 7 measurements over 7 days         | Every morning          | 7                 |
| <b>Subjective hourly light exposure and activities</b> | Modified Harvard Light Exposure Questionnaire (modified H-LEA)                                                       | 7 measurements over 7 days         | Every evening          | 7                 |
| <b>Subjective wellbeing</b>                            | WHO-5 wellbeing index (WHO-5)                                                                                        | 7 measurements over 7 days         | Every evening          | 7                 |
| <b>Exercise frequency and type</b>                     | Exercise log                                                                                                         | 7 measurements over 7 days         | Every evening          | 7                 |
| <b>Subjective light exposure</b>                       | Modified Harvard Light Exposure Questionnaire (modified H-LEA). Experience                                           | 24 measurements over 7 days        | 4 times/day            | 22                |



|                                                    |                                                                                                                        |                                    |                           |                          |
|----------------------------------------------------|------------------------------------------------------------------------------------------------------------------------|------------------------------------|---------------------------|--------------------------|
|                                                    | sampling: punctual measurement on participants' current light conditions                                               |                                    |                           |                          |
| <b>Subjective alertness</b>                        | Karolinska Sleepiness Scale (KSS). Experience sampling: punctual measurement on participants' current light conditions | 22 measurements over 7 days        | 4 times/day               | 22                       |
| <b>Subjective mood</b>                             | MoodZoom questionnaire                                                                                                 | 22 measurements over 7 days        | 4 times/day               | 22                       |
| <b>Experience log</b>                              | Custom-made questionnaire and open-ended questions about positive and negative experiences wearing the light logger    | Continuous measurement over 7 days | Throughout the experiment | Depending on participant |
| <b>Wear log</b>                                    | Custom-made questionnaire about time of taking the device off and putting it back on                                   | Continuous measurement over 7 days | Throughout the experiment | Depending on participant |
| <b>Subjective light sensitivity</b>                | Visual Light Sensitivity Questionnaire 8 (VLSQ-8)                                                                      | 1 measurement over 7 days          | Last experimental day     | 1                        |
| <b>User experience of wearing the light logger</b> | Open-ended questions                                                                                                   | 1 measurement over 7 days          | Last experimental day     | 1                        |
| <b>Sleep environment</b>                           | Assessment of sleep environment                                                                                        | 1 measurement over 7 days          | Last experimental day     | 1                        |

It is made available under a [CC-BY 4.0 International license](#) .

|                                  |                                            |                           |                       |   |
|----------------------------------|--------------------------------------------|---------------------------|-----------------------|---|
|                                  | questionnaire (ASE)                        |                           |                       |   |
| <b>Subjective light exposure</b> | Light Exposure Behaviour Assessment (LEBA) | 1 measurement over 7 days | Last experimental day | 1 |

596 **Table 2:** Measurement schedule.

| Measurement modality                    | Derived measure and unit                     | Definition                   | Number of measurements per participant | Pre-processing                                                                                                                                                                                                                                                                                                                                                                                                 | Linked confirmatory analysis |
|-----------------------------------------|----------------------------------------------|------------------------------|----------------------------------------|----------------------------------------------------------------------------------------------------------------------------------------------------------------------------------------------------------------------------------------------------------------------------------------------------------------------------------------------------------------------------------------------------------------|------------------------------|
| Objective light exposure at three sites | Melanopic EDI (lux)                          | Weighted spectral irradiance | Depending on participant               | <ol style="list-style-type: none"> <li>1. Removal of non-wear times <math>\geq 10</math> minutes after visual inspection and if probability score between non-wear sources <math>\geq 0.66</math></li> <li>2. Removal of single day if 20% data is missing during given day between Tuesday and Sunday</li> <li>3. Removal of participant if missing data for entire day between Tuesday and Sunday</li> </ol> | H1, H2 & H3                  |
| Subjective light exposure               | Rating – different modified H-LEA categories | Perceived light exposure     | 7                                      | <ol style="list-style-type: none"> <li>1. Removal of hours where entry is missing</li> <li>2. Exclusion of secondary light source for hourly each entry</li> </ol>                                                                                                                                                                                                                                             | H1                           |
| Chronotype                              | MCTQ                                         | Chronotype                   | 1                                      | Calculation on $MSF_{sc}$                                                                                                                                                                                                                                                                                                                                                                                      | H2                           |

597

598 **Table 3:** Primary outcome measures

599

600

## References

- 601 [1] C. Blume, C. Garbazza, and M. Spitschan, "Effects of light on human circadian rhythms, sleep and  
602 mood," *Somnologie*, vol. 23, no. 3, pp. 147–156, Sep. 2019, doi: 10.1007/s11818-019-00215-x.
- 603 [2] Cibeira et al., "Healthcare | Free Full-Text | Bright Light Therapy in Older Adults with Moderate to  
604 Very Severe Dementia: Immediate Effects on Behavior, Mood, and Physiological Parameters."  
605 Accessed: Aug. 02, 2023. [Online]. Available: <https://www.mdpi.com/2227-9032/9/8/1065>
- 606 [3] R. Lok, K. C. H. J. Smolders, D. G. M. Beersma, and Y. A. W. de Kort, "Light, alertness, and  
607 alerting effects of white light: a literature overview," *J Biol Rhythms*, vol. 33, no. 6, pp. 589–601,  
608 Dec. 2018, doi: 10.1177/0748730418796443.
- 609 [4] S. L. Chellappa, M. C. M. Gordijn, and C. Cajochen, "Can light make us bright? Effects of light on  
610 cognition and sleep," in *Progress in Brain Research*, vol. 190, Elsevier, 2011, pp. 119–133. doi:  
611 10.1016/B978-0-444-53817-8.00007-4.
- 612 [5] S. L. Chellappa, R. Lasauskaite, and C. Cajochen, "In a Heartbeat: Light and Cardiovascular  
613 Physiology," *Frontiers in Neurology*, vol. 8, 2017, Accessed: Dec. 04, 2023. [Online]. Available:  
614 <https://www.frontiersin.org/articles/10.3389/fneur.2017.00541>
- 615 [6] C. B. Swope et al., "Factors associated with variability in the melatonin suppression response to  
616 light: A narrative review," *Chronobiology International*, pp. 1–15, Mar. 2023, doi:  
617 10.1080/07420528.2023.2188091.
- 618 [7] S. L. Chellappa, "Individual differences in light sensitivity affect sleep and circadian rhythms,"  
619 *Sleep*, vol. 44, no. 2, p. zsa214, Feb. 2021, doi: 10.1093/sleep/zsa214.
- 620 [8] S. Westland, Q. Pan, and S. Lee, "A review of the effects of colour and light on non-image function  
621 in humans," *Coloration Technology*, vol. 133, no. 5, pp. 349–361, 2017, doi: 10.1111/cote.12289.
- 622 [9] N. E. Klepeis et al., "The National Human Activity Pattern Survey (NHAPS): a resource for  
623 assessing exposure to environmental pollutants," *J Expo Sci Environ Epidemiol*, vol. 11, no. 3,  
624 Art. no. 3, Jul. 2001, doi: 10.1038/sj.jea.7500165.
- 625 [10] K. Y. Lai, C. Sarkar, M. Y. Ni, L. W. T. Cheung, J. Gallacher, and C. Webster, "Exposure to light at  
626 night (LAN) and risk of breast cancer: A systematic review and meta-analysis," *Science of The  
627 Total Environment*, vol. 762, p. 143159, Mar. 2021, doi: 10.1016/j.scitotenv.2020.143159.
- 628 [11] Y. Cho, S.-H. Ryu, B. R. Lee, K. H. Kim, E. Lee, and J. Choi, "Effects of artificial light at night on  
629 human health: A literature review of observational and experimental studies applied to exposure  
630 assessment," *Chronobiology International*, vol. 32, no. 9, pp. 1294–1310, Oct. 2015, doi:  
631 10.3109/07420528.2015.1073158.
- 632 [12] Y.-M. M. Park, A. J. White, C. L. Jackson, C. R. Weinberg, and D. P. Sandler, "Association of  
633 Exposure to Artificial Light at Night While Sleeping With Risk of Obesity in Women," *JAMA  
634 Internal Medicine*, vol. 179, no. 8, pp. 1061–1071, Aug. 2019, doi:  
635 10.1001/jamainternmed.2019.0571.
- 636 [13] A. C. Burns et al., "Day and night light exposure are associated with psychiatric disorders: an  
637 objective light study in >85,000 people," *Nat. Mental Health*, vol. 1, no. 11, pp. 853–862, Nov.  
638 2023, doi: 10.1038/s44220-023-00135-8.
- 639 [14] D. A. Golombek et al., "Sleep Capital: Linking Brain Health to Wellbeing and Economic  
640 Productivity Across the Lifespan," *The American Journal of Geriatric Psychiatry*, Jul. 2024, doi:  
641 10.1016/j.jagp.2024.07.011.
- 642 [15] T. M. Brown et al., "Recommendations for daytime, evening, and nighttime indoor light exposure to  
643 best support physiology, sleep, and wakefulness in healthy adults," *PLoS Biol*, vol. 20, no. 3, p.  
644 e3001571, Mar. 2022, doi: 10.1371/journal.pbio.3001571.
- 645 [16] F. S. Webler, M. Spitschan, R. G. Foster, M. Andersen, and S. N. Peirson, "What is the 'spectral  
646 diet' of humans?," *Current Opinion in Behavioral Sciences*, vol. 30, pp. 80–86, Dec. 2019, doi:  
647 10.1016/j.cobeha.2019.06.006.
- 648 [17] S. Hartmeyer, F. Webler, and M. Andersen, "Towards a framework for light-dosimetry studies:  
649 Methodological considerations," *Lighting Research & Technology*, p. 14771535221103258, Jul.  
650 2022, doi: 10.1177/14771535221103258.

- 651 [18]M. Spitschan *et al.*, “Verification, analytical validation and clinical validation (V3) of wearable  
652 dosimeters and light loggers,” *Digit Health*, vol. 8, p. 20552076221144858, 2022, doi:  
653 10.1177/20552076221144858.
- 654 [19]S. Hartmeyer and M. Andersen, “Towards a framework for light-dosimetry studies: Quantification  
655 metrics,” *Lighting Research & Technology*, p. 147715352311705, May 2023, doi:  
656 10.1177/14771535231170500.
- 657 [20]K. J. Reid, G. Santostasi, K. G. Baron, J. Wilson, J. Kang, and P. C. Zee, “Timing and intensity of  
658 light correlate with body weight in adults,” *PLoS One*, vol. 9, no. 4, p. e92251, 2014, doi:  
659 10.1371/journal.pone.0092251.
- 660 [21]A. Didikoglu *et al.*, “Associations between light exposure and sleep timing and sleepiness while  
661 awake in a sample of UK adults in everyday life,” *Proceedings of the National Academy of  
662 Sciences*, vol. 120, no. 42, p. e2301608120, Oct. 2023, doi: 10.1073/pnas.2301608120.
- 663 [22]A. M. Biller, P. Balakrishnan, and M. Spitschan, “Behavioural determinants of physiologically-  
664 relevant light exposure,” Mar. 18, 2024, OSF. doi: 10.31219/osf.io/xpt4e.
- 665 [23]M. A. Siraji *et al.*, “An inventory of human light exposure behaviour,” *Sci Rep*, vol. 13, no. 1, p.  
666 22151, Dec. 2023, doi: 10.1038/s41598-023-48241-y.
- 667 [24]M. A. Siraji, M. Spitschan, V. Kalavally, and S. Haque, “Light exposure behaviors predict mood,  
668 memory and sleep quality,” *Sci Rep*, vol. 13, no. 1, p. 12425, Aug. 2023, doi: 10.1038/s41598-  
669 023-39636-y.
- 670 [25]P. A. Harris, R. Taylor, R. Thielke, J. Payne, N. Gonzalez, and J. G. Conde, “Research electronic  
671 data capture (REDCap)—A metadata-driven methodology and workflow process for providing  
672 translational research informatics support,” *Journal of Biomedical Informatics*, vol. 42, no. 2, pp.  
673 377–381, Apr. 2009, doi: 10.1016/j.jbi.2008.08.010.
- 674 [26]P. A. Harris *et al.*, “The REDCap consortium: Building an international community of software  
675 platform partners,” *Journal of Biomedical Informatics*, vol. 95, p. 103208, Jul. 2019, doi:  
676 10.1016/j.jbi.2019.103208.
- 677 [27]T. Roenneberg, L. K. Keller, D. Fischer, J. L. Madera, C. Vetter, and E. C. Winnebeck, “Human  
678 activity and rest in situ,” *Methods Enzymol*, vol. 552, pp. 257–283, 2015, doi:  
679 10.1016/bs.mie.2014.11.028.
- 680 [28]P. A. Harris *et al.*, “MyCap: a flexible and configurable platform for mobilizing the participant  
681 voice,” *JAMIA Open*, vol. 5, no. 2, p. ooac047, Jul. 2022, doi: 10.1093/jamiaopen/ooac047.
- 682 [29]J. A. Horne and O. Östberg, “Individual differences in human circadian rhythms,” *Biological  
683 Psychology*, vol. 5, no. 3, pp. 179–190, Sep. 1977, doi: 10.1016/0301-0511(77)90001-1.
- 684 [30]J. D. Verriotto *et al.*, “New Methods for Quantification of Visual Photosensitivity Threshold and  
685 Symptoms,” *Transl Vis Sci Technol*, vol. 6, no. 4, p. 18, Jul. 2017, doi: 10.1167/tvst.6.4.18.
- 686 [31]C. E. Carney *et al.*, “The consensus sleep diary: standardizing prospective sleep self-monitoring,”  
687 *Sleep*, vol. 35, no. 2, pp. 287–302, Feb. 2012, doi: 10.5665/sleep.1642.
- 688 [32]A. Bajaj, B. Rosner, S. W. Lockley, and E. S. Schernhammer, “Validation of a light questionnaire  
689 with real-life photopic illuminance measurements: the Harvard Light Exposure Assessment  
690 questionnaire,” *Cancer Epidemiol Biomarkers Prev*, vol. 20, no. 7, pp. 1341–1349, Jul. 2011, doi:  
691 10.1158/1055-9965.EPI-11-0204.
- 692 [33]A. Tsanas *et al.*, “Daily longitudinal self-monitoring of mood variability in bipolar disorder and  
693 borderline personality disorder,” *J Affect Disord*, vol. 205, pp. 225–233, Nov. 2016, doi:  
694 10.1016/j.jad.2016.06.065.
- 695 [34]T. Akerstedt and M. Gillberg, “Subjective and objective sleepiness in the active individual,” *Int J  
696 Neurosci*, vol. 52, no. 1–2, pp. 29–37, May 1990, doi: 10.3109/00207459008994241.
- 697 [35]Bech, P., “Measuring the dimensions of psychological general well-being by the WHO-5,” *QoL  
698 Newsletter*, vol. 32, pp. 15–16, 2004.
- 699 [36]M. A. Grandner *et al.*, “Development and Initial Validation of the Assessment of Sleep  
700 Environment (ASE): Describing and Quantifying the Impact of Subjective Environmental Factors  
701 on Sleep,” *Int J Environ Res Public Health*, vol. 19, no. 20, p. 13599, Oct. 2022, doi:  
702 10.3390/ijerph192013599.
- 703 [37]J. Zauner, L. Udovicic, and M. Spitschan, “Power analysis for personal light exposure

- 704 measurements and interventions,” In Review, preprint, Dec. 2023. doi: 10.21203/rs.3.rs-  
705 3771881/v1.
- 706 [38]L. L. A. Price, M. Khazova, and L. Udovičić, “Assessment of the Light Exposures of Shift-working  
707 Nurses in London and Dortmund in Relation to Recommendations for Sleep and Circadian  
708 Health,” *Annals of Work Exposures and Health*, vol. 66, no. 4, pp. 447–458, Apr. 2022, doi:  
709 10.1093/annweh/wxab092.
- 710 [39]D. Bates, M. Mächler, B. Bolker, and S. Walker, “Fitting Linear Mixed-Effects Models Using **lme4**,”  
711 *J. Stat. Soft.*, vol. 67, no. 1, 2015, doi: 10.18637/jss.v067.i01.
- 712 [40]Y. Benjamini and Y. Hochberg, “Controlling the False Discovery Rate: A Practical and Powerful  
713 Approach to Multiple Testing,” *Journal of the Royal Statistical Society: Series B (Methodological)*,  
714 vol. 57, no. 1, pp. 289–300, Jan. 1995, doi: 10.1111/j.2517-6161.1995.tb02031.x.
- 715 [41]D. Kelley and C. Richards, *oce: Analysis of Oceanographic Data*. 2024. [Online]. Available:  
716 <https://dankelley.github.io/oce/>  
717
