# 1 Protocol for a prospective, multi-centric, cross-sectional 2 cohort study to assess personal light exposure

3  
4 Carolina Guidolin<sup>1, 2</sup> [[0009-0007-4959-2667](#)]

5 Ljiljana Udovicic<sup>3</sup>, [[0000-0002-6035-8309](#)]

6 Kai Broszio<sup>3</sup>, [[0000-0002-8269-8654](#)]

7 David Baeza Moyano<sup>4</sup>, [[0000-0001-8395-9994](#)]

8 Sofía Melero-Tur<sup>4</sup>, [[0000-0002-5902-4539](#)]

9 Guadalupe Cantarero-García<sup>4</sup>, [[0000-0003-3169-8547](#)]

10 Roberto Alonso González-Lezcano<sup>4</sup>, [[0000-0002-6185-4929](#)]

11 Sam Aerts<sup>5</sup>, [[0000-0002-7444-4312](#)]

12 John Bolte<sup>5</sup>, [[0000-0001-8301-5547](#)]

13 Hongli Joosten-Ma<sup>5</sup>

14 Maria Nilsson Tengelin<sup>6</sup>, [[0000-0002-0909-626X](#)]

15 Oliver Stefani<sup>7</sup>, [[0000-0003-0199-6500](#)]

16 Altuğ Didikoğlu<sup>8</sup>, [[0000-0002-5582-6956](#)]

17 Johannes Zauner<sup>2</sup>, [[0000-0003-2171-4566](#)]

18 Manuel Spitschan<sup>1, 2, 8</sup>, [[0000-0002-8572-9268](#)] \*

19

20 1 Max Planck Institute for Biological Cybernetics, Max Planck Research Group Translational Sensory & Circadian  
21 Neuroscience, Tübingen, Germany

22 2 TUM School of Medicine and Health, Department Health and Sports Sciences, Chronobiology & Health, Technical  
23 University of Munich, Munich, Germany

24 3 Federal Institute for Occupational Safety and Health (BAuA), Dortmund, Germany

25 4 Research Group ARIE, Department of Architecture and Design, Universidad San Pablo-CEU, CEU Universities, Madrid,  
26 Spain

27 5 Research Group Smart Sensor Systems, The Hague University of Applied Sciences, Delft, The Netherlands

28 6 Department of Measurement Science and Technology, RISE Research Institutes of Sweden, Borås, Sweden

29 7 Lucerne University of Applied Sciences and Arts, Lucerne, Switzerland

30 8 Department of Neuroscience, Izmir Institute of Technology, Gulbahce, Urla, 35430 Izmir, Turkey

31 9 TUM Institute for Advanced Study (TUM-IAS), Technical University of Munich, Garching, Germany

32

33 \* Corresponding author: [manuel.spitschan@tum.de](mailto:manuel.spitschan@tum.de)

## 34 Author contributions

35 *Conceptualisation*: C.G., M.S.

36 *Data curation*: n/a

37 *Formal Analysis*: n/a

38 *Funding acquisition*: L.U., D.B.M., M.N.T., O.S., M.S.

39 *Investigation*: n/a

40 *Methodology*: C.G., L.U., K.B., D.B.M., S.M.-T., G.C-G., R.A.G.-L., S.A., J.B., H.J.-M., M.N.T., O.S.,  
41 A.D., J.Z., M.S.

42 *Project administration*: M.S.

43 *Resources*: n/a

44 *Software*: C.G., J.Z., M.S.

45 *Supervision*: n/a

46 *Validation*: n/a

47 *Visualisation*: C.G.

48 *Writing – original draft*: C.G., M.S.

49 *Writing – review & editing*: C.G., L.U., K.B., D.B.M., S.M.-T., G.C-G., R.A.G.-L., S.A., J.B., H.J.-M.,  
50 M.N.T., O.S., A.D., J.Z., M.S.

## 51 Funding statement

52 The project (22NRM05 MeLiDos) has received funding from the European Partnership on Metrology,  
53 co-financed by the European Union's Horizon Europe Research and Innovation Programme and by  
54 the Participating States.

## 55 Abstract

56 Light profoundly impacts many aspects of human physiology and behaviour, including the  
57 synchronization of the circadian clock, the production of melatonin, and cognition. These effects of  
58 light, termed the non-visual effects of light, have been primarily investigated in laboratory settings,  
59 where light intensity, spectrum and timing can be carefully controlled to draw associations with  
60 physiological outcomes of interest. Recently, the increasing availability of wearable light loggers has  
61 opened the possibility of studying personal light exposure in free-living conditions where people  
62 engage in activities of daily living, yielding findings associating aspects of light exposure and health  
63 outcomes, supporting the importance of adequate light exposure at appropriate times for human  
64 health. However, comprehensive protocols capturing *environmental* (e.g., geographical location,  
65 season, climate, photoperiod) and *individual* factors (e.g., culture, personal habits, behaviour,  
66 commute type, profession) contributing to the measured light exposure are currently lacking. Here, we  
67 present a protocol that combines smartphone-based experience sampling (ESM implementing  
68 Karolinska Sleepiness Scale, KSS, ratings) and high-quality light exposure data collection at three  
69 body sites (near-corneal plane between the two eyes mounted on spectacle, neck-worn  
70 pendant/badge, and wrist-worn watch-like design) to capture daily factors related to individuals' light  
71 exposure. We will be implement the protocol in an international multi-centre study to investigate the  
72 environmental and socio-cultural factors influencing light exposure patterns in Germany, Netherlands,  
73 Spain, Sweden, and Turkey (minimum n=15, target n=30 per site, minimum n=75, target n=150 across  
74 all sites). With the resulting dataset, lifestyle and context-specific factors that contribute to healthy light  
75 exposure will be identified. This information is essential in designing effective public health  
76 interventions.

|     |                                              |           |
|-----|----------------------------------------------|-----------|
| 77  | <b>Contents</b>                              |           |
| 78  | Author contributions .....                   | 1         |
| 79  | Funding statement.....                       | 1         |
| 80  | Abstract .....                               | 2         |
| 81  | <b>Introduction .....</b>                    | <b>5</b>  |
| 82  | Background .....                             | 5         |
| 83  | Prior evidence .....                         | 6         |
| 84  | <b>Objectives .....</b>                      | <b>7</b>  |
| 85  | <b>Methods and materials .....</b>           | <b>7</b>  |
| 86  | Sample .....                                 | 7         |
| 87  | Inclusion and exclusion criteria.....        | 7         |
| 88  | Participant recruitment.....                 | 8         |
| 89  | Stopping guidelines .....                    | 8         |
| 90  | Measures.....                                | 9         |
| 91  | Light measurements .....                     | 9         |
| 92  | Protocol .....                               | 14        |
| 93  | Study design .....                           | 14        |
| 94  | Environment and context .....                | 14        |
| 95  | Screening.....                               | 14        |
| 96  | Procedure .....                              | 14        |
| 97  | Timeline .....                               | 16        |
| 98  | Randomization.....                           | 16        |
| 99  | Statistical analysis .....                   | 16        |
| 100 | Power analysis.....                          | 16        |
| 101 | Pre-processing.....                          | 17        |
| 102 | Statistical analysis and pre-processing..... | 18        |
| 103 | Confirmatory analysis .....                  | 18        |
| 104 | Exploratory analyses .....                   | 20        |
| 105 | Data storage and privacy.....                | 21        |
| 106 | Outcomes .....                               | 21        |
| 107 | Primary outcome measures.....                | 21        |
| 108 | Secondary outcome measures .....             | 21        |
| 109 | Other measurements .....                     | 22        |
| 110 | Code, data and materials availability .....  | 23        |
| 111 | <b>Ethics approval .....</b>                 | <b>24</b> |
| 112 | <b>Conflicts of interest .....</b>           | <b>24</b> |
| 113 | <b>Figures .....</b>                         | <b>25</b> |
| 114 | <b>Tables.....</b>                           | <b>26</b> |

|     |                        |           |
|-----|------------------------|-----------|
| 115 | <b>References.....</b> | <b>34</b> |
| 116 |                        |           |
| 117 |                        |           |

## 118 Introduction

## 119 Background

120 Light significantly affects human health and behaviour, from modulation of circadian rhythms and  
121 sleep to regulation of cognitive and neuroendocrine functions (Blume et al., 2019). The effects of light  
122 on human physiology can be observed acutely as changes in alertness and mood, according to timing  
123 and intensity of light stimuli (Cibeira et al., 2021; Lok et al., 2018). Furthermore, long-lasting  
124 consequences on the endocrine and immune systems are known to follow chronic exposure to  
125 artificial light at night, as this induces misalignment with the environmental day/night cycle. For  
126 example, shift workers have an increased risk of developing diseases such as cancer and metabolic  
127 disorders (Lunn et al., 2017; Moreno et al., 2019; Ward et al., 2019).

128 The human relationship to light has fundamentally changed over the past decades with the advent of  
129 highly efficient light-emitting diode (LED) lamps and emissive displays such as smartphones and  
130 laptops (Westland et al., 2017). The increased availability and luminous output of these novel light  
131 sources, together with the large number of people in modern 24/7 society suffering from circadian  
132 misalignment, pose the question of how these light exposure patterns affect our mental and physical  
133 health. Recent expert consensus-based recommendations by Brown and colleagues (2022) provide a  
134 framework for understanding the appropriate light amounts for healthy, day-active individuals during  
135 daytime, evening, and nighttime hours to maintain optimal physiology and circadian health. Whether  
136 the “spectral diet” or the light exposure patterns experienced by an individual (Webler et al., 2019)  
137 meets these recommendations has not yet been established.

138 Over the past 20 years, researchers in this field have attempted to measure personal light exposure in  
139 field settings using various wearable devices (Hartmeyer et al., 2022). These devices, known as light  
140 loggers, can be worn in various positions on the body, including the wrist (e.g. as a wristwatch), chest  
141 (e.g. as a pendant or brooch), or eye level (e.g. on a pair of glasses) by study participants. When worn  
142 continuously over time, these wearable devices approximate the retinal irradiance an individual  
143 receives daily. The melanopic retinal irradiance drives the physiological effects of light (Spitschan et  
144 al., 2022). Light exposure patterns can yield light metrics, including time spent above a specific light  
145 threshold (time above threshold, TAT; (Hartmeyer & Andersen, 2023)) and variability of light timing  
146 (mean light timing, MLiT; (Reid et al., 2014)). These metrics can subsequently be linked to health  
147 outcomes of interest (Spitschan et al., 2022). For example, field studies using wrist-worn light loggers  
148 have shown an association between greater light exposure before sleep with lower self-reported  
149 alertness during the day (Didikoglu et al., 2023), poorer objective sleep quality (Cain et al., 2020),  
150 differences in sleep-wake consolidaton (Lok et al., 2023), and altered sleep architecture (Wams et al.,

151 2017). Furthermore, higher light exposure during sleep has been linked to later sleep offset and poorer  
152 sleep continuity (Mead et al., 2023).

153 As wearable light loggers become more accessible, research on light exposure patterns in free-living  
154 conditions has surged (Hartmeyer et al., 2022). Much of the literature, however, remains descriptive,  
155 linking light metrics to one or two health outcomes of interest, usually related to cognitive performance  
156 and sleep health. While highly informative, these investigations fail to capture the contextual and  
157 behavioural dimensions leading to a given light exposure pattern. An individual's "spectral diet"  
158 ultimately depends on many factors, including environmental ones (geographical location, season,  
159 climate and photoperiod) as well as interindividual ones (culture, personal habits, behaviour, commute  
160 type and profession). Furthermore, while some determinants of daily light exposure are independent of  
161 the individual (e.g. type of lights present in one's office), individuals can exert a level of control on their  
162 light exposure by actively seeking or avoiding behaviours which involve specific light exposure (e.g.  
163 having lunch break outside or inside) (Siraji, Lazar, et al., 2023; Siraji, Spitschan, et al., 2023).  
164 Considering the growing evidence that well-timed light exposure is crucial to support human health, it  
165 is vital not only to describe the timing and quantities of light that individuals receive during the day but  
166 also to understand which contextual and behavioural factors contribute to specific light exposure  
167 patterns. This information is essential to identify populations at risk of receiving insufficient or aberrant  
168 light exposure throughout the day and, ultimately, to design effective personalised interventions to  
169 improve people's light exposure.

170 Here, we outline a comprehensive study protocol for field studies to collect rich and high-quality  
171 datasets comprising of light exposure data and its contextual and behavioural contributors. To obtain  
172 clean light exposure data from the light loggers, we describe in detail how to instruct participants and  
173 ensure their compliance with the protocol. Additionally, we present a questionnaire structure designed  
174 to capture daily factors linked to individual light exposure using a mobile app interface. Overall, this  
175 protocol provides a framework that researchers interested in collecting light exposure data can flexibly  
176 adjust. We will use this protocol to create a reference dataset that characterises individual light  
177 exposure over seven days at five different geographical locations in Europe. Our dataset will  
178 characterise light exposure and probe the suitability of light logging devices in different geographical  
179 and sociocultural contexts. This will help identify context- and lifestyle-specific factors associated with  
180 healthy light exposure patterns, which will serve as a first step to designing effective public health  
181 interventions.

## 182 Prior evidence

183 **Table 1** summarises some relevant prior literature underlying our research questions. For a  
184 systematic overview of prior studies, see (Hartmeyer et al., 2022). Bierman et al. (2005), Higgins et al.

185 (2010), Rea et al. (2011), and Smolders et al. (2013) used a head-mounted device that measures  
186 personal light exposure at the corneal plane. The device was tested in various settings with different  
187 outcome measures. A similar device, which provides eye-level illuminance data, was presented by  
188 Hubalek and colleagues (2010). Bajaj et al. (2011a) investigated the correlation between self-reported  
189 subjective light exposure via a seven-day retrospective questionnaire and photopic light exposure  
190 objectively measured by a head-mounted light dosimeter. These studies are relevant to our research  
191 as we intend to use an adapted version of their questionnaire to measure daily personal light  
192 exposure. Furthermore, the studies by Brown et al. (2021) and Cheng et al. (2021) describe novel,  
193 non-physiological methods to predict individuals' circadian phases. Finally, the studies by (Balajadia et  
194 al., 2023) and van Duijnhoven et al. (2017) highlight the limitations of current corneal-plane light  
195 loggers placed laterally on glasses in ensuring high-quality data experience by participants.

## 196 Objectives

197 The three objectives of the study are

- 198 1. To characterise individuals' light exposure over seven days utilizing a near-corneal-plane light  
199 logger placed at the centre of non-prescription glasses frame, along with a light logger as a  
200 chest-worn pendant and a wrist-worn light logger;
- 201 2. To collect data across four countries (Germany, Netherlands, Spain, Sweden, and Turkey);  
202 and
- 203 3. To investigate the correlations between recommended light exposure, physiological variables  
204 such as chronotype and light sensitivity, and behavioral outcomes including exercise, mood,  
205 and alertness.

## 206 Methods and materials

### 207 Sample

#### 208 Inclusion and exclusion criteria

209 Eligible participants will be selected according to the inclusion and exclusion criteria listed in **Table 2**.  
210 These include demographic as well as mental and physical health parameters. Individuals with  
211 corrected vision requiring prescription glasses during the experimental week will be excluded due to  
212 incompatibility with our light glasses. However, individuals with a) prescription lenses or b) prescription  
213 glasses but are able and willing to wear prescription contact lenses during the experimental week will



214 be able to participate in our study. Individuals suffering from psychiatric or sleep disorders will be  
215 excluded from the study. Furthermore, intake of any drugs and/or medications known to influence  
216 photosensitivity will be considered a criterion for exclusion. Finally, only people based at or near (<60  
217 km) the local hubs of each geographical location during the weekdays (Monday to Friday) of the  
218 experiment will be accepted for this study to have similar environmental conditions across participants  
219 at each measurement hub. All criteria mentioned above for inclusion and exclusion will be assessed  
220 by self-report through an online platform developed for this purpose (Research Electronic Data  
221 Capture, REDCap; (Harris et al., 2009, 2019, 2022)). The eligibility criteria used here can be modified  
222 for studies in which the goal is to assess a different population.

## 223 Participant recruitment

224 Participants will be recruited by self-selection through advertisements which will be posted at the local  
225 hubs (Spain: FUSP-CEU, Sweden: RISE, Netherlands: THUAS, Germany: BAuA, TUM, Turkey:  
226 IZTECH) as well as in local newsletters. Participants interested in the study will be directed to an  
227 online platform (REDCap) for the initial screening survey. Detailed information about the study and its  
228 aim will be provided during this screening step. Inclusion and exclusion criteria will be tested using a  
229 questionnaire on the same online platform. This questionnaire will also collect demographic data (age,  
230 sex, gender, native language(s) and occupational status). If eligible for the study, participants will then  
231 be contacted by the experimenters to agree on possible participation dates and discuss any further  
232 questions.

233 Furthermore, they will be sent a picture of what the light logger looks like and asked if they feel  
234 comfortable wearing them throughout the experimental week. They will also be informed about the  
235 availability of the researchers throughout the experiment in case of doubts or technical issues with the  
236 light logger. Participants will be compensated at the end of the study according to their compliance  
237 with the experimental procedure: for every day of wearing the light logger for at least 80% of their  
238 waking hours (as defined by the Munich Chronotype Questionnaire; MCTQ) (Roenneberg et al.,  
239 2015), volunteers will receive financial compensation, such that those adhering to the whole duration  
240 of the experiment will receive more than those adhering, for example, to only four out of the seven  
241 experimental days. The rates of financial compensation will depend on each measurement site and  
242 local customs.

## 243 Stopping guidelines

244 Data collection can terminate after reaching at least  $n=15$  per site, with a target of  $n=30$ . The  
245 researchers will terminate the study for an individual participant in case of technical issues which do  
246 not allow the experiment to continue, e.g., when the light logger is not working as expected.

## 247 Measures

### 248 Light measurements

#### 249 Personal light logging

250 To measure personal light exposure, we will deploy ActLumus light loggers (Condor Instruments, São  
251 Paulo, Brazil) worn by participants for one week. ActLumus light loggers contain ten spectral channels,  
252 the outputs of which are combined to estimate photopic and melanopic irradiance. Throughout the  
253 trial, participants will wear three light loggers:

- 254 1. To measure light centrally in the near-corneal plane, the light loggers will be placed on the  
255 frame of non-prescription glasses. A 3D-printed holder for the light loggers has been designed  
256 and attached to the bridge of the glasses frame, enabling the insertion and removal of the  
257 ActLumus devices.
- 258 2. To measure light on the chest, the light loggers will be clipped to clothing or worn as a  
259 pendant.
- 260 3. To measure light on the wrist, a conventional location, the light loggers will be worn with  
261 manufacturer-provided wrist bands.

262 The sampling interval of each ActLumus light logger will be set to 10 seconds to achieve highly  
263 temporally resolved data, and the devices will never be turned off nor charged during the experimental  
264 week. Light exposure data for each participant will then be downloaded only upon the return of the  
265 devices on the final Monday (day 8). The choice of light loggers used here can vary depending on the  
266 availability.

267 As the use of non-prescription glasses still requires the use of lenses without optical power, the  
268 transmittance properties of the lenses will be measured between 250 and 2500 nm.

#### 269 Activity measurement

270 One of the ActLumus light loggers will be worn on the wrist. The ActLumus measures movement  
271 through an integrated tri-axial accelerometer and is used in field studies such as ours to distinguish  
272 wake and sleep time. Participants will be instructed to keep the wrist-worn device on during the day  
273 and night and only remove it when in contact with water and during contact sports.

#### 274 First-day questionnaires (Chronotype questionnaires)

275 On the first day of the experiment, participants completed two questionnaires measuring circadian  
276 time and circadian preference: the Munich Chronotype Questionnaire (MCTQ, (Roenneberg et al.,  
277 2015)) and the Morning-Eveningness Questionnaire (MEQ, (Horne & Östberg, 1977)). The MCTQ is

278 used to assess circadian time using questions about their sleep and wake habits during work and free  
279 days and commute type. The MEQ is used to determine the circadian preference of individuals to  
280 perform certain activities at specific times of the day.

### 281 Continuous questionnaires

282 All continuous measurements except the Light exposure and activity diary are completed by  
283 participants on the MyCap app (Harris et al., 2022). This mobile application for survey data collection  
284 integrates with REDCap (Harris et al., 2009, 2019).

### 285 Wear log

286 Throughout the day, participants are instructed to report their wear and non-wear time (only  
287 concerning the spectacle-worn glasses) in a digital log book. Specifically, they have five choices of  
288 wear log entry: 1 = "Taking the light glasses off", 2 = "Putting the light glasses on", 3 = "Taking the light  
289 glasses off before sleep and placing them on a nightstand or flat surface", 4 = "Leaving <study location  
290 > and its surroundings (60 km radius)" and 5 = "Re-entering < study location > and its surroundings  
291 (60 km radius)". For options 1 to 3, participants also press the button on the light glasses to signal an  
292 event occurring, and in the case of 1, they are asked to confirm whether they place the light glasses in  
293 the black bag provided to them and if they are in movement. Options 4 and 5 are introduced to control  
294 for potential differences in personal light exposure due to environmental availability rather than  
295 behaviour. For all the five wear log entry choices, participants must state whether they are logging a  
296 present or a past event.

297 Additionally, participants are asked for the reasons they took the off ("What is prompting you to  
298 remove the light logger?"), with the options "Sports activity", "Leisure activity where I do not feel  
299 comfortable wearing the light logger (e.g. public space)", "Activity involving contact with water (e.g.,  
300 showering or bathing)", "Discomfort due to wearing the light glasses (e.g. disturbance to eyesight or  
301 pain due to weight)" and "Other (please specify)".

### 302 Experience log

303 During the week, participants also have the opportunity to report their experiences with the light  
304 glasses using a log on the app. This log prompts participants to describe situations in which they  
305 received verbal or nonverbal feedback from others and personal comfort with wearing the light  
306 glasses. They are also asked whether and how these experiences might influence their future use of  
307 the light glasses.

### 308 Morning sleep log

309 Every morning after waking up, participants fill in the core Consensus Sleep Diary (Carney et al.,  
310 2012) consisting of 9 items to assess their sleep timing, sleep duration during the night, and subjective  
311 sleep quality. This last item is scored on a five-point Likert scale (1 = “Very poor” to 5 = “Very good”).

### 312 Ecological momentary assessment (“Current conditions”)

313 Four times a day (at 11:00, 14:00, 17:00 and 20:00), participants fill in a questionnaire concerning their  
314 current light conditions, mood and sleepiness. The researcher sends a reminder message through the  
315 REDCap/MyCap messaging channel, and phone alarms set by participants at these times serve to  
316 ensure compliance. Firstly, current light conditions are tested through a multiple-choice question,  
317 where participants can choose one of 8 possible light scenarios as the “main light source” and, if  
318 applicable, as the “secondary light source”. The potential light sources to choose from consist of the  
319 same categories listed in the modified Harvard Light Exposure Assessment diary, which participants  
320 fill in every evening (see “Light exposure and activity diary”, H-LEA; (Bajaj et al., 2011b)). Secondly, a  
321 modified MoodZoom questionnaire (Tsanas et al., 2016) assesses current mood. Lastly, sleepiness is  
322 assessed using the Karolinska Sleepiness Scale (KSS; (Akerstedt & Gillberg, 1990)) on a 10-point  
323 Likert scale ranging from 1 = “Extremely alert” to 10 = “Extremely sleepy, fighting sleep”.

### 324 Exercise log

325 Every evening before sleep, participants complete a custom-made questionnaire about the exercise  
326 they performed during the day. This questionnaire was designed to assess intensity  
327 (vigorous/moderate/light, lack of exercise) and location (indoors/outdoors) of exercise, as well as  
328 sedentary time (“How much time did you spend sitting or reclining?”).

### 329 Wellbeing log

330 Every evening before sleep, participants complete a modified version of the WHO-5 Wellbeing Index  
331 (Bech, P., 2004), consisting of 5 statements (1 = “I have felt cheerful and in good spirits”, 2 = “I have  
332 felt calm and relaxed”, 3 = “I have felt active and vigorous”, 4 = “How would you rate the quality of your  
333 sleep last night?”, and 5 = “My daily life has been filled with things that interest me”). Participants have  
334 to express agreement using a 5-point Likert scale ranging from 0 = “At no time” to 5 = “All of the time”  
335 (for statements 1, 2, 3 and 5) and from 1 = “Very poor” to 5 = “Very good” for statement 4.

### 336 Worktime log

337 Every evening before sleep, participants complete a custom-made questionnaire on the clock times  
338 they went to their workplace, how, and when they returned home.

### 339 Light exposure and activity log

340 Every evening, participants have to fill in a modified version of the Harvard Light Exposure  
341 Assessment (H-LEA; (Bajaj et al., 2011b)). This is referred to as “mH-LEA” and is done on paper using  
342 a form provided by the experimenter during the in-person visit (see Appendix). Participants are asked  
343 to report, for each hour of the day, the primary light source they are exposed to and the activity they  
344 performed in that hour. The primary light source is described as “the biggest and brightest light  
345 source”. They can choose between 8 light categories (L = “Electric light source indoors (e.g., lamps  
346 such as LEDs)”, S = “Electric light source outdoors (e.g., street lights)”, I = “Daylight indoors (through  
347 windows)”, O = “Daylight outdoors (including being in the shade)”, E = “Emissive displays (e.g.,  
348 smartphone, laptop etc.)”, D = “Darkness (outdoors and/or indoors)”, W = “Light entering from outside  
349 during sleep (e.g., daylight, street lights etc.)”). If they believe they are exposed to a combination of  
350 lights within the same hour, they can choose from the following combinations: “L+I”, “L+E”, “I+E”,  
351 “S+O”, and “D+W”. With regards to their activity, they could choose between “8 categories (1 =  
352 “Sleeping in bed”, 2 = “Awake at home”, 3 = “On the road with public transport/car”, 4 = “On the road  
353 with bike/on foot”, 5 = “Working in the office/from home”, 6 = “Working outdoors (including lunch break  
354 outdoors), 7 = “Free time outdoors (e.g. garden/park etc.), 8 = “Other: please specify (e.g. sport)”. To  
355 ensure that participants complete this task, they send a picture of the completed form every night and  
356 upload it to a shared folder (separate for each participant) where the experimenter could check  
357 compliance. Furthermore, they are asked to rate the confidence in their answers (“How sure are you  
358 about the light exposure and activity categories you chose?”) on MyCap, where they can answer using  
359 a 5-point Likert scale ranging from 1 = “Not confident at all” to 5 = “Completely confident”.

### 360 Final day questionnaires

361 On their final day of the experiment, participants return the devices and filled in a series of  
362 questionnaires and open-ended questions on their phones, during an in-person visit to the laboratory.

### 363 Light Exposure Behaviour Assessment (LEBA)

364 The 22-item Light Exposure Behaviour Assessment (LEBA; (Siraji, Lazar, et al., 2023)) is used to  
365 retrospectively assess individuals' light behaviours during the experimental week. Since the first three  
366 items of this instrument ask questions related to wearing blue-filtering, orange-tinted and/or red-tinted  
367 glasses, which do not apply to our participants due to the presence of the light logger device, these  
368 items are eliminated. The final questionnaire thus comprises the remaining 19 items. These concern  
369 specific behaviours such as exposure to daylight, smartphone use, light-related bedtime habits and  
370 electric light use at home. Participants can express the frequency of such behaviours using a 5-point  
371 Likert scale ranging from 1 = “Never” to 5 = “Always”.

## 372 Visual Light Sensitivity Questionnaire-8 (VLSQ-8)

373 Participants complete the 8-point Visual Light Sensitivity Questionnaire-8 (VLSQ-8; (Verriotto et al.,  
374 2017)) to answer questions about their visual light sensitivity during the experimental week. The  
375 questions include aspects of frequency and severity of photosensitivity as well as impacts of  
376 photosensitivity on daily behaviours, and participants answer using a 5-point Likert scale (1 = “Never”  
377 to 5 = “Always”).

## 378 Assessment of Sleep Environment (ASE) questionnaire

379 The 13-item Assessment of Sleep Environment (ASE) questionnaire is used to ask participants about  
380 aspects such as light, noise, temperature and humidity in their sleeping environment (Grandner et al.,  
381 2022), which might affect their sleeping quality as well as the light measured by the light logger placed  
382 next to participants during sleep (e.g., in case of light coming through windows during sleep).  
383 Participants can express their agreement to each item using a 5-point Likert scale (1 = “Strongly  
384 agree” to 5 = “Strongly disagree”).

## 385 Open-ended questions

386 To further probe the usability of our light logger, we present participants with the following open-ended  
387 questions: “Can you describe any challenges or discomfort you experienced while wearing the light  
388 glasses? How did you cope with them?”, “In what situations did you notice the light glasses having the  
389 most impact on your daily activities or behaviour?”, “How did you adapt your behaviour, if at all,  
390 because of the light glasses? Please provide some examples.”, “Can you share any suggestions or  
391 improvements for the design or functionality of the light glasses (comprising the sensor and the  
392 glasses) for future experiments?”, “Please describe any situations or activities where the light glasses  
393 failed to capture your “typical” light exposure because you had to take them off?”, and “How  
394 comfortable were the light glasses for you to wear during your daily activities?”.

## 395 OPTIONAL: Environmental light logging

396 To measure the environmental light in the local site during each experimental week, one ActLumus  
397 light logger will optionally be placed on the rooftop of a chosen building. The set-up for these  
398 environmental light measurements consists of a black metal floor, where the device lies horizontally,  
399 covered by a plastic half-dome to minimise light scattering while ensuring protection from the elements  
400 (Figure 2). This set-up is placed on the rooftop before participants start the study every week and  
401 remain there for the entire week until participants discharge, measuring environmental light with a  
402 sampling interval of 30 seconds. Each day, a researcher will check and, if necessary, clean the  
403 outside and/or the inside of the set-up from dirt or rain. At the end of each experimental week, the data

404 from this environmental light logger will be downloaded, and the device will be charged before being  
405 placed back on the rooftop just before the next participants start the study on the same day. As not all  
406 sites can complete this measurement, this measurement is optional.

## 407 Protocol

### 408 Study design

409 This experiment is an observational field study in which all participants will undergo the same  
410 experimental conditions and questionnaires. These are shown in **Table 3**.

### 411 Environment and context

412 The study will take place between 1 March 2024 and 31 March 2025. On the first and last day of the  
413 experiment, each volunteer will complete questionnaires at the local hub. During the field part of this  
414 study, in which the participants will be wearing the light logger, the environment and settings will  
415 depend on each participant, occupation, and activities. These include households, workplaces, and  
416 outdoor and public indoor spaces.

417 We will collect additional contextual data to keep track of the environmental and light conditions at  
418 each local hub.

- 419 • Where possible, a light logger covered by a protective plastic cover will optionally be placed on  
420 a rooftop without vertical obstructions/shading. This light logger will be checked regularly  
421 during weeks of experimental data collection to ensure it remains in good condition.
- 422 • When such measurements are impossible, secondary data sources, including historical  
423 weather data, sunshine duration, sunrise/sunset times, or existing radiation measurement  
424 infrastructure, will be used.

### 425 Screening

426 Screening for the current study will take place online using a screening questionnaire. The criteria of  
427 inclusion/exclusion are based on self-reported answers provided by the participants in this online  
428 questionnaire. This screening survey will be available online from March 2024 onwards so that  
429 participant enrollment in the study will remain open during the months of data collection.

### 430 Procedure

431 A schematic representation of the experimental procedure is illustrated in **Figure 1**. Eligible  
432 participants will start the experiment on a Monday with an in-person visit to the office or laboratory of

433 the selected hub and finish the experiment on the following Monday. On the first Monday (day 1), they  
434 will receive a detailed explanation of the experiment and sign an informed consent document.  
435 Volunteers will then be provided with the three wearable light loggers. They will receive detailed  
436 instructions on using both devices correctly, including removing them when in contact with water and  
437 during contact sports. Participants will also install the MyCap app (Harris et al., 2022), which is used to  
438 fill in daily questionnaires and set alarms on their phones as reminders to complete the scheduled  
439 questionnaires on the app. Before leaving, participants will complete two questionnaires measuring  
440 circadian time and circadian preference (MCTQ and MEQ, respectively).

441 Participants will wear the three light loggers throughout the week during their daily activities.  
442 Participants will be instructed to log non-wear time as follows. When taking off the spectacle-mounted  
443 light logger during the day, they will press the event button on the device and place it in a black bag.  
444 They will then log this action in the “Wear log” on the MyCap app. Similarly, when putting the light  
445 logger back on, they will take it out of the black bag, press the event button, and log this action in the  
446 “Wear log” on the MyCap app. If the participants forget the black bag, they will be prompted to  
447 describe where they placed the light glasses instead.

448 Before sleep, participants will place the spectacle-worn light logger facing upwards on a bedside table  
449 or flat surface near their bed. They will also log this action in the “Wear log”. In case participants exit  
450 the local area (defined as a 60 km radius from the local hub), they will describe where they are located  
451 at this time and report when they re-entered the local area on the “Wear log”. Each “Wear log” entry  
452 includes taking a timestamp of the moment they performed this action, and this date time information  
453 is then used in the analysis to distinguish wear and non-wear time. In case they forget to log an  
454 activity, participants are allowed to log any of the five possible “Wear log” events (“Light logger on”,  
455 “Light logger off”, “Light logger off before sleep”, “Exiting local area”, “Re-entering local area”) as “past  
456 events” which happened previously. In this case, they are instructed to try their best to remember and  
457 retrospectively report the times of these actions.

458 Every morning after waking up, participants will start wearing the light logger and log this in the  
459 “Wear log” on the MyCap app. They will also fill in a questionnaire regarding their sleep (Consensus  
460 Sleep Diary; CSD). Throughout the day, they will receive notifications at four scheduled times to fill in  
461 questionnaires regarding their current light conditions (modified Harvard Light Exposure Assessment  
462 Questionnaire; modified H-LEA), alertness (Karolinska Sleepiness Scale; KSS) and mood  
463 (MoodZoom). In the evening, participants will complete questionnaires about their light exposure and  
464 activities during the last 24 hours (modified H-LEA), wellbeing (WHO-5 Wellbeing Index; WHO-5) and  
465 exercise (custom questionnaire). Throughout the experiment, participants will also report their  
466 positive and negative experiences in the “Experience log”.

467 Participants will return to the local centre on the following Monday, one week after the experiment  
468 starts. On this day, they will return the devices and complete a retrospective questionnaire regarding



469 their light exposure (Light Exposure Behaviour Assessment; LEBA), light sensitivity (Visual Light  
470 Sensitivity Questionnaire-8; VLSQ-8), and their sleep environment (Assessment of Sleep  
471 Environment questionnaire; ASE) during the seven days they participated in the study. Furthermore,  
472 they will complete open-ended questions about their opinions on the light logger device. After  
473 completing these questionnaires, participants will be reimbursed based on their compliance with the  
474 experiment. The devices will be charged, and the next set of participants will start the experiment  
475 later that day.  
476 All questionnaires will be

## 477 Timeline

478 Participants will begin the experiment on a Monday according to their and the researchers' availability.  
479 Each participant will wear the light loggers for seven consecutive days and thus return to the  
480 laboratory on the consecutive Monday. The number of participants wearing the light logger during the  
481 same week (Monday to Monday) may vary according to availability of participants and devices, i.e.,  
482 more than one volunteer might be taking part in the study during the same seven days.

## 483 Randomization

484 This is an observational experiment where all participants undergo the same experimental conditions;  
485 therefore, no randomisation will be necessary for this study.  
486

## 487 Statistical analysis

### 488 Power analysis

489 A sample size calculation based on power analysis was performed based on a framework described  
490 elsewhere (Zauner et al., 2023). The calculation was based on a historical dataset (Price et al.,  
491 2022) provided by one of the geographical locations (Germany: BAuA); where participants measured  
492 light exposure for multiple days in winter, spring, and summer with devices attached to clothing at  
493 chest height. A suitable subset of this data was used to calculate the necessary sample size to reach  
494 a power of 0.8 across common light exposure metrics when comparing them between winter and  
495 summer seasons. While the experiment producing the historical data deviates somewhat from the  
496 current study's experimental structure, it still allows for a realistic comparison of metrics between  
497 different environmental conditions while considering intra-individual variability. The sample size  
498 calculation is based on a bootstrap resampling of daily metrics between winter and summer. For each

499 resampled dataset, significance was tested in a mixed-effect model (fixed effect: season, random  
500 effect: participants) with a significance level of 0.05. The fraction of significant differences were  
501 compared against the power level threshold of 0.8. The required sample size is the minimum sample  
502 size that reaches this threshold, with 1000 resamples per sample size (sample sizes from 3 to 50 were  
503 tested). A total of twelve metrics were analyzed:

- 504 • Geometric mean of melanopic EDI (lx)
- 505 • Geometric standard deviation of melanopic EDI (lx)
- 506 • Luminous exposure (lx\*h)
- 507 • Time above 250 lux (h)
- 508 • Time above 1000 lux (h)
- 509 • Mean timing of light above 250 lux (h)
- 510 • Mean timing of light below 10 lux (h)
- 511 • Intradaily variability
- 512 • Mean across the darkest (L5) hours (lx)
- 513 • Midpoint of the darkest (L5) hours (lx)
- 514 • Mean across brightest (M10) hours (lx)
- 515 • Midpoint of the brightest (M10) hours (lx)

516 Three metrics had no effect in the historical dataset and thus did not reach the power threshold  
517 (Geometric standard deviation, mean timing of light above 250 lux, midpoint of darkest 5 hours). With  
518 a sample size of 15 participants, eight out of nine metrics showed sufficient power (intradaily  
519 variability: 21 participants to threshold power). Even considering a high dropout rate of 33% leaves  
520 seven out of nine metrics sufficiently powered (mean of darkest 5 hours: 15 participants to threshold  
521 power).

522

## 523 Pre-processing

524 Objectively measured light exposure data will be log-transformed (base 10) to account for large light  
525 level differences, such as indoor and outdoor light exposure.

526 Data from the light logger will be processed to separate non-wear time from wear time. This will be  
527 possible through information from three sources:

- 528 • Wear log completed by the participant;
- 529 • Button presses done by the participant;
- 530 • Light exposure recordings while in a black bag (expected to drop to near 0 during non-wear  
531 time).

532 We will confirm non-wear time by visual inspection and concordance between at least two sources.  
533 Concordance between the three sources of non-wear will be calculated as a probability score: the  
534 three sources will be combined as binary variables for each non-wear period as detected by visual  
535 inspection. The criterion for non-wear time classification will be set to  $\geq 0.66$ . Once confirmed by visual  
536 inspection and probability score, non-wear times of  $\geq 10$  minutes will be removed.

537 We will apply stringent exclusion criteria for our confirmatory tests (see Confirmatory analysis). We will  
538 exclude the following missing data in hourly analyses:

- 539 • Missing entry on the modified H-LEA for a given hour during waking hours: if no category has  
540 been selected for a given waking hour (waking hours as specified in the sleep log of the  
541 corresponding day);
- 542 • Missing 50% of objectively measured light exposure for a given hour.

543 Furthermore, we will exclude an individual day from the analysis if 20% of the objective light exposure  
544 data from a participant's waking hours (specified in the MCTQ) is missing. This does not apply to the  
545 first and last experimental days, as these are not "complete" days (participants will receive and return  
546 the light logger throughout the day).

547 Finally, we will exclude a participant from the analysis if an entire day of objective light exposure data  
548 is missing, meaning no data was recorded with the light logger from Tuesday to Sunday.

549 When data have been excluded from confirmatory analyses, we may include them in future  
550 exploratory analyses.

## 551 Statistical analysis and pre-processing

552 We plan to analyse all data with the R software and the package LightLogR  
553 (<https://tscnlab.github.io/LightLogR/index.html>) which provides a workflow for the processing,  
554 visualization and metrics calculation based on wearable light logger data. If not otherwise specified  
555 below, the planned method for statistical analysis is through (linear) mixed-effect models implemented  
556 with the lme4 package (Bates et al., 2015). Equations follow the notation used by the package. p-  
557 values obtained by likelihood-ratio tests of the full model with the effect in question, against the model  
558 without the effect. p-values less than or equal to 0.05 will be considered significant. p-value  
559 adjustment for multiple tests within each hypothesis is planned using Benjamini and Hochberg's *false*  
560 *discovery rate* (FDR) method (Benjamini & Hochberg, 1995).

## 562 Confirmatory analysis

563 We plan to perform the two following confirmatory analyses:

- 564 1. H1: We hypothesize that there is a significant relationship between hourly self-reported light

565 exposure categories and hourly median objective light exposure.

566 a. Preparation: Hourly entry on light sources from daily modified H-LEA will serve as  
567 categorical variables. In the case of two light sources for a given hour, only the primary  
568 light source will be considered (as reported by participants). The median melanopic  
569 equivalent daylight illuminance (melanopic equivalent daylight illuminance; mEDI) as  
570 measured objectively by the light logger for the corresponding hour will be calculated.

571 b. Analysis: mel EDI is used as the dependent variable, and H-LEA as the fixed effect,  
572 participants within each geolocation as random effect. Participant's geolocation, sex,  
573 age, occupational status and chronotype (MCTQ) are added as covariates. The  
574 dependency of mel EDI and H-LEA as well as the weekday is allowed to vary between  
575 participants within a geolocation. The resulting formula is as follows:

$$576 E(\widetilde{\text{mel EDI}}) = \text{H-LEA} + \text{geolocation} + \text{weekday} + \text{sex} + \text{age} + \text{occupational status} + \\ 577 \text{chronotype} + (1 + \text{H-LEA} + \text{weekday} \mid \text{geolocation:participant}) \quad (1)$$

578 2. H2: We hypothesize that MCTQ-measured chronotype  $\text{MSF}_{\text{sc}}$  (mid-sleep on free days corrected  
579 for sleep debt on weekdays) and  $\text{MLiT}^{250 \text{ lx mEDI}}$  (mean light timing >250 lx melanopic EDI) are  
580 correlated, such that earlier chronotypes receive light earlier in the day.

581 a. Preparation: calculate MCTQ-derived  $\text{MSF}_{\text{sc}}$  for each participant and calculate  $\text{MLiT}^{250 \text{ lx}}$   
582  $\text{mEDI}$  as average clock time of all data points >250 lx mEDI over the six measurement  
583 days for each participant.

584 b. Analysis: Spearman's rank correlation coefficient between  $\text{MSF}_{\text{sc}}$  and 6-day average  
585  $\text{MLiT}^{250 \text{ lx mEDI}}$  for each participant. Additional models with various ring-fenced covariates  
586 will be built in future steps.

587 3. H3: We hypothesize that there is a significant difference between daily average objective light  
588 exposure and geographical location, and additionally, that the differences in photoperiod explain  
589 a substantial part of that relationship

590 a. Preparation: calculate the daily mel EDI light dose (in lx\*h) as measured objectively by  
591 the light logger for the corresponding day. Calculate also the photoperiod of that day for  
592 a given location as the time from sunrise until sunset (sun elevation equal to zero), as  
593 calculated by the sun angles given from the `oce` R package  
594 (<https://dankelley.github.io/oce/>).

595 b. Analysis: daily mel EDI light dose (in lx\*h) is the dependent continuous variable.  
596 Geolocation is the independent categorical variable. A second step also includes  
597 photoperiod. Weekday, sex, age, and chronotype are covariates. Participant ID within  
598 geolocation is a random effect, as is the weekday effect for each participant. The full  
599 formula is as follows:

600  $E(\text{Light Dose}) = \text{geolocation} + \text{photoperiod} + \text{weekday} + \text{sex} + \text{age} + \text{chronotype} +$   
601  $(1 + \text{weekday} | \text{geolocation} : \text{participant}) (2)$

## 602 Exploratory analyses

603 We plan to explore several relationships regarding behavioural and self-reported data. These are  
604 listed here for transparency.

### 605 1. Light exposure

606 1.1. Relationship between metrics of light exposure that describe light properties (melanopic EDI  
607 and photopic illuminance) and between metrics describing the temporal pattern of light  
608 exposure, including light regularity index (LRI), intraday variability (IV), interday stability (IS).

609 1.2. Comparison between objectively measured light exposure during weekdays and weekends.

610 1.3. Relationship between retrospective light exposure items as measured by the LEBA  
611 instrument and objective light exposure.

612 1.4. Relationship between environmental conditions during the experimental week (e.g.  
613 photoperiod availability, sunlight hours and temperature) and objective light exposure.

614 1.5. Relationship between light exposure measured and mood and alertness ratings measured  
615 throughout the day.

616 1.6. Relationship between subjective light sensitivity as reported by the VLSQ-8 and objective  
617 light exposure.

618 1.7. Relationship between daily objective light exposure and wellbeing scores as measured by  
619 the WHO-5 questionnaire.

620 1.8. Relationship between exercise frequency and type as measured by the exercise log and  
621 objective light exposure.

622 1.9. Relationship between geolocation, photoperiod and other metrics of light exposure (see 1.1),  
623 also in interaction with the weekday.

### 624 2. Light logger acceptability:

625 2.1. Descriptive analysis of open-ended questions on wearing the light logger.

626 2.2. Relationship between negative and positive experiences as reported in the experience log  
627 and non-wear time as reported in the wear log.

628

## 629 Data storage and privacy

630 Data collected through REDCap and MyCap will be pseudonymized in the system and stored on this  
631 system until the end of data analysis. Anonymised data will be made publicly available after the  
632 publication of the primary research publication.

633

## 634 Outcomes

### 635 Primary outcome measures

636 To answer our confirmatory research questions, our primary outcome measures are the following:

- 637 1. Daily light exposure (examined in H1 & H3)
- 638 2. Chronotype (examined in H2)

### 639 Secondary outcome measures

640 Our secondary outcome measures will be described using descriptive statistics. These will include:

- 641 • Daily behavioural outcomes:
    - 642 ○ Sleep log
    - 643 ○ Exercise logs
    - 644 ○ Wellbeing log
  - 645 • Experience sampling measurements of:
    - 646 ○ Alertness
    - 647 ○ Light exposure conditions
    - 648 ○ Mood
  - 649 • Retrospective questionnaires on:
    - 650 ○ Light exposure
    - 651 ○ Light sensitivity
  - 652 • Environmental conditions as measured by the light logger placed on the roof.
  - 653 • Participants' experience wearing the light logger:
    - 654 ○ Open-ended questions
    - 655 ○ Experience log
- 656

## 657 Other measurements

658 Additional measurements will include the demographic characteristics of the participants provided  
659 during screening.

## 660 Translation and adaptation of questionnaires

661 To run the study in our five sites, translation of surveys and questionnaires is required. To this end, a  
662 team-based, multi-step process will be employed to achieve this goal, involving a diverse group of  
663 individuals, including trained translators and experts in the survey's subject matter (based on the  
664 "TRAPD" approach to translate questionnaires). The source language is English and the target  
665 languages are German (Germany), Dutch (Netherlands), Swedish (Sweden), Spanish (Spain) and  
666 Turkish (Turkey). We will use the following strategy:

### 667 **Team approach:**

- 668 • Assemble a translation team of individuals from diverse backgrounds, bringing together  
669 interdisciplinary expertise.
- 670 • Ensure that the team consists of at least three independent members (two acting as translators  
671 and one as a reviewer/adjudicator).

### 672 **Translator selection:**

- 673 • Ideally, choose two translators with experience (and some training) in translating  
674 surveys/questionnaires.
- 675 • The translators should have proficiency in both the source language (the language of the original  
676 questionnaire) and the target language (the language into which the questionnaire will be  
677 translated). Ideally the translators translate into their mother tongue.
- 678 • Ideally at least one of the two translators is a trained and/or professional translator.

### 679 **First project meeting:**

- 680 • Discuss potential future challenges translating the questionnaires and surveys and flag items that  
681 may be difficult (source questionnaire).

### 682 **Initial parallel translations:**

- 683 • Begin the translation process with two parallel translations of the source instrument into the target  
684 language (by the two translators mentioned above). The two translators should not contact each  
685 other while translating, but deliver independent translations.

### 686 **Review discussion and adjudication**

- 687 • In a "Review" discussion, all items of the questionnaire should be discussed at least by the three  
688 persons of the translation team, possibly more: compare and discuss the two initial translations  
689 and try to agree on one translation: this may be one of the two initial translations, a blend of both

690 or a completely new translation, developed during the discussion.

- 691 • A “Reviewer” should chair the session. This should be an expert in the matter with good
- 692 proficiency in both English and the target language.
- 693 • Include an adjudicator with expert knowledge in the subject matter to resolve any discrepancies or
- 694 ambiguities in the translations. This may be the third person in the translation team, the “Reviewer”
- 695 (then called “Reviewer-cum-Adjudicator”), or an additional, 4th person. If the adjudicator is a 4th
- 696 person, he/she may participate in the Review meeting, or be consulted after the meeting.
- 697 • The translators should be present during this session to answer any language-related questions,
- 698 clarify, and bring in the translation perspective.

#### 699 **Pre-test of the translation:**

- 700 • Conduct a cognitive pretesting (n≈10) of the translated questionnaire to assess its
- 701 comprehensibility and cultural appropriateness.
- 702 • This pretest should involve a sample of the target population who will eventually complete the
- 703 translated questionnaire.
- 704 • Based on the pretest results, consider making necessary adjustments to the translated
- 705 questionnaire to improve its clarity and cultural relevance.
- 706 • If significant issues arise, conducting further cognitive pretesting iterations is advisable.
- 707 • In case the cognitive pretests reveal weaknesses of the source questionnaire, please report back
- 708 to the central team.

#### 709 **Final Review:**

- 710 • Review and finalise the translated questionnaire based on the feedback and insights gained from
- 711 the run-through and cognitive pretesting.

#### 712 **Quality Assurance:**

- 713 • Maintain a comprehensive documentation of the entire translation process, including all versions of
- 714 the questionnaire, meeting notes, and participant feedback.
- 715 • Ensure that the final translated questionnaire is linguistically accurate, culturally appropriate, and
- 716 equivalent in meaning to the source instrument.

717

## 718 Code, data and materials availability

719 Upon conclusion of the primary analyses, the data will be made available under the Creative  
720 Commons license (CC-BY) with no reservations in the supplementary material of the research  
721 publication and/or on a public repository (e.g., FigShare).



## 722 Ethics approval

723 This research protocol was reviewed and approved by the Medical Ethics Committee of the Technical  
724 University of Munich (2023-115-S-KK).

## 725 Conflicts of interest

726 The authors declare that the study will be conducted without any financial or commercial relationships  
727 that could be explained as a conflict of interest.

## 728 Figures

729

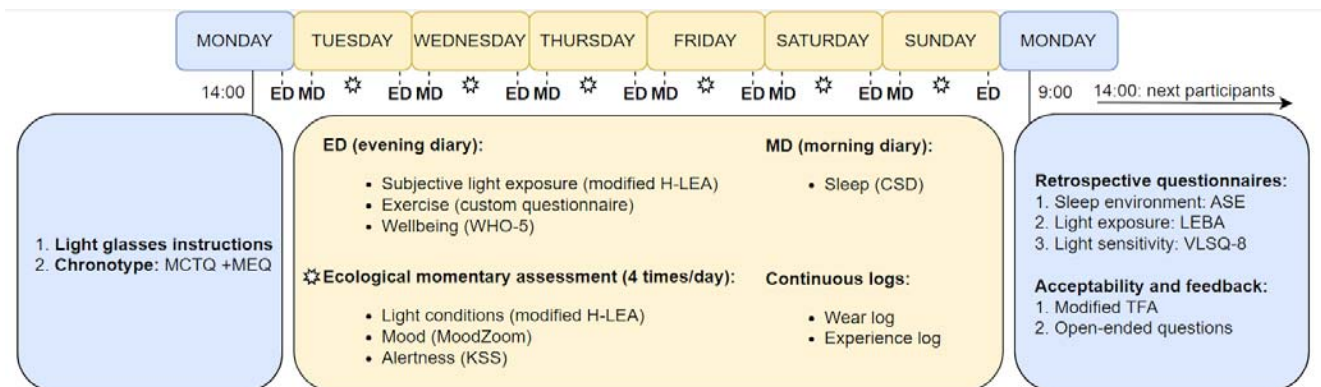

730

731 Figure 1: Schematic representation of the experimental timeline of the experiment (Monday to  
732 Monday).

## Tables

| Reference              | Subject group                                                   | Level of analysis   | Sample size                   | Methods                                                                                                                     | Overall findings                                                                                                                                                       |
|------------------------|-----------------------------------------------------------------|---------------------|-------------------------------|-----------------------------------------------------------------------------------------------------------------------------|------------------------------------------------------------------------------------------------------------------------------------------------------------------------|
| Bierman et al. (2005)  | Humans                                                          | Observational study | N = 2 (sex unspecified)       | Illuminance quantification (lux) using head-mounted device in 1) laboratory settings (5 h) and 2) real-world settings (2 h) | Validation of portable head-mounted device (Daysimeter) to measure light exposure and circadian dosimetry in field settings                                            |
| Higgins et al. (2010)  | Humans (elderly individuals with dementia and their caregivers) | Case study          | N = 2 (1 female, 1 male)      | Head-mounted device (Daysimeter) and actimeters simultaneously worn (7 days)                                                | Daysimeter is more reliable device for measuring light exposure at rest compared to a wrist-worn actimeter with light sensors                                          |
| Rea et al. (2011)      | Humans (female teachers)                                        | Observational study | N = 72 (females)              | Comparison of sensitivity of satellite photometers, Daysimeters, and self-reports of light exposure                         | Daysimeter-measured light exposure does not correlate with a) self-reports on light exposure and b) satellite measured light levels                                    |
| Smolders et al. (2013) | Humans (office employees and students)                          | Observational study | N = 42 (20 males, 22 females) | Daysimeter used to measure variations in light exposure over season. Correlation with self-reported vitality ratings.       | Amount of daily light exposure as measured using the Daysimeter correlates with individuals' feelings of vitality, especially during winter months and during mornings |
| Bajaj et al. (2011)    | Humans (females,                                                | Observational study | N = 132 (females)             | Head-mounted device (Daysimeter) light                                                                                      | Self-reported light exposure correlates                                                                                                                                |

|                         |                                                                                     |                     |                              |                                                                                                                                          |                                                                                                                                                                                                            |
|-------------------------|-------------------------------------------------------------------------------------|---------------------|------------------------------|------------------------------------------------------------------------------------------------------------------------------------------|------------------------------------------------------------------------------------------------------------------------------------------------------------------------------------------------------------|
|                         | including shift workers)                                                            |                     |                              | exposure measurement (7 days) and retrospective self-reported light exposure (7 days)                                                    | with photopic illuminance provided by the Daysimeter ( $r = 0.72$ )                                                                                                                                        |
| Hubalek et al. (2010)   | Humans (office workers)                                                             | Observational study | N = 23 (16 males, 6 females) | Head-mounted device (LuxBlick) light exposure measurement (7 days) and daily diaries on sleep quality                                    | LuxBlick device (head-mounted sensors + waist-worn data recorder) provides eye-level data on daily illuminance of office workers. Positive correlation between sleep quality and amounts of light exposure |
| Brown et al. (2021)     | Humans (college students under forced desynchrony protocols and habitual schedules) | Modelling           | N = 174 (sex unspecified)    | Tested and trained a neural network used to classify melatonin onset under different circadian schedules                                 | Circadian phase estimation can be obtained by circadian patterns of activity rather than dim-light melatonin onset (DLMO) estimation                                                                       |
| Cheng et al. (2021)     | Humans (shift workers)                                                              | Modelling           | N = 45 (37 females, 8 males) | Actigraphy data and hourly melatonin collected from shift workers. Actigraphy data used as input to model prediction of circadian phase. | Wearable wrist actimeters with light sensors provide better estimation of circadian phase compared to DLMO measurements                                                                                    |
| Balajadia et al. (2023) | Humans (students)                                                                   | Observational study | N = 18 (9 females, 9 males)  | Combination of acceptability scales and open-ended questions to test acceptability of corneal-plane light                                | Participants had modest device acceptability and reported size and weight as main aspects to be                                                                                                            |

|                              |        |                     |                              |                                                                                                                                                            |                                                                                                                                                                                                                             |
|------------------------------|--------|---------------------|------------------------------|------------------------------------------------------------------------------------------------------------------------------------------------------------|-----------------------------------------------------------------------------------------------------------------------------------------------------------------------------------------------------------------------------|
|                              |        |                     |                              | dosimeter (lido) placed laterally on non-prescription glasses, worn for 24 h                                                                               | improved. Instability of the glasses due to lateral placement of the light logger was also reported                                                                                                                         |
| van Duijnhoven et al. (2017) | Humans | Observational study | N = 21 (12 males, 9 females) | Questionnaires testing participants' comfort on 6 different devices (including one corneal-plane device placed laterally non-prescription glasses) for 2 h | Participants reported most annoyances for wearing the corneal-plane device compared to other devices in different locations. These complaints mainly were from participants not used to wearing glasses in their daily life |

734 **Table 1:** Selection of prior literature. Note: In the assessment of sex/gender proportions, no  
735 differences were made.

736

| <b>Aspect</b>                            | <b>Assessment modality</b> | <b>Exclusion criterion and cut-off</b>                                                         | <b>Timing of Screening</b> |
|------------------------------------------|----------------------------|------------------------------------------------------------------------------------------------|----------------------------|
| <b>Age</b>                               | Self-report                | <18 years<br>>65 years                                                                         | Initial screening survey   |
| <b>Psychiatric and sleep disorders</b>   | Self-report                | Presence of any                                                                                | Initial screening survey   |
| <b>Tobacco and recreational drug use</b> | Self-report                | Regular use (1/week or more)                                                                   | Initial screening survey   |
| <b>Medication intake</b>                 | Self-report                | Presence of any known to influence photosensitivity                                            | Initial screening survey   |
| <b>Visual acuity</b>                     | Self-report                | Requirement of prescription glasses during the experimental week                               | Initial screening survey   |
| <b>Normal vision</b>                     | Self-report                | History of ocular or retinal diseases, colour blindness                                        | Initial screening survey   |
| <b>Location during experimental week</b> | Self-report                | Exiting local hubs ( $\geq 60$ km) during weekdays (Monday to Friday) of the experimental week | Initial screening survey   |
| <b>Shift work</b>                        | Self-report                | Shiftwork in the past two months                                                               | Initial screening survey   |
| <b>Parenthood</b>                        | Self-report                | Parent of a child <1 year old                                                                  | Initial screening survey   |
| <b>Full-time employment</b>              | Self-report                | Unemployment, leave, working part-time (<80%), studying                                        | Initial screening survey   |

737 **Table 2:** Inclusion and exclusion criteria.

738

| <b>Read-out</b>                                        | <b>Measurement modality</b>                                                                                          | <b>Sampling frequency</b>          | <b>Timing of sampling</b> | <b>N per participant</b> |
|--------------------------------------------------------|----------------------------------------------------------------------------------------------------------------------|------------------------------------|---------------------------|--------------------------|
| <b>Objective individual light exposure</b>             | Light logger                                                                                                         | Continuous measurement over 7 days | Every 10 seconds          | Approx. 10080            |
| <b>Objective activity/rest</b>                         | Actimeter                                                                                                            | Continuous measurement over 7 days | Every 10 seconds          | Approx. 10080            |
| <b>Chronotype</b>                                      | Munich Chronotype Questionnaire (MCTQ, circadian time) and Morning Evening Questionnaire (MEQ, circadian preference) | 1 measurement over 7 days          | First experimental day    | 1                        |
| <b>Subjective sleep</b>                                | Consensus Sleep Diary (CSD)                                                                                          | 7 measurements over 7 days         | Every morning             | 7                        |
| <b>Subjective hourly light exposure and activities</b> | Modified Harvard Light Exposure Questionnaire (modified H-LEA)                                                       | 7 measurements over 7 days         | Every evening             | 7                        |
| <b>Subjective wellbeing</b>                            | WHO-5 wellbeing index (WHO-5)                                                                                        | 7 measurements over 7 days         | Every evening             | 7                        |
| <b>Exercise frequency and type</b>                     | Exercise log                                                                                                         | 7 measurements over 7 days         | Every evening             | 7                        |
| <b>Subjective light exposure</b>                       | Modified Harvard Light Exposure Questionnaire (modified H-LEA). Experience                                           | 24 measurements over 7 days        | 4 times/day               | 22                       |

|                                                    |                                                                                                                        |                                    |                           |                          |
|----------------------------------------------------|------------------------------------------------------------------------------------------------------------------------|------------------------------------|---------------------------|--------------------------|
|                                                    | sampling: punctual measurement on participants' current light conditions                                               |                                    |                           |                          |
| <b>Subjective alertness</b>                        | Karolinska Sleepiness Scale (KSS). Experience sampling: punctual measurement on participants' current light conditions | 22 measurements over 7 days        | 4 times/day               | 22                       |
| <b>Subjective mood</b>                             | MoodZoom questionnaire                                                                                                 | 22 measurements over 7 days        | 4 times/day               | 22                       |
| <b>Experience log</b>                              | Custom-made questionnaire and open-ended questions about positive and negative experiences wearing the light logger    | Continuous measurement over 7 days | Throughout the experiment | Depending on participant |
| <b>Wear log</b>                                    | Custom-made questionnaire about time of taking the device off and putting it back on                                   | Continuous measurement over 7 days | Throughout the experiment | Depending on participant |
| <b>Subjective light sensitivity</b>                | Visual Light Sensitivity Questionnaire 8 (VLSQ-8)                                                                      | 1 measurement over 7 days          | Last experimental day     | 1                        |
| <b>User experience of wearing the light logger</b> | Open-ended questions                                                                                                   | 1 measurement over 7 days          | Last experimental day     | 1                        |
| <b>Sleep environment</b>                           | Assessment of sleep environment                                                                                        | 1 measurement over 7 days          | Last experimental day     | 1                        |



|                                  |                                            |                           |                       |   |
|----------------------------------|--------------------------------------------|---------------------------|-----------------------|---|
|                                  | questionnaire (ASE)                        |                           |                       |   |
| <b>Subjective light exposure</b> | Light Exposure Behaviour Assessment (LEBA) | 1 measurement over 7 days | Last experimental day | 1 |

739

**Table 3:** Measurement schedule.

| Measurement modality                    | Derived measure and unit                     | Definition                   | Number of measurements per participant | Pre-processing                                                                                                                                                                                                                                                                                                                                                                                                 | Linked confirmatory analysis |
|-----------------------------------------|----------------------------------------------|------------------------------|----------------------------------------|----------------------------------------------------------------------------------------------------------------------------------------------------------------------------------------------------------------------------------------------------------------------------------------------------------------------------------------------------------------------------------------------------------------|------------------------------|
| Objective light exposure at three sites | Melanopic EDI (lux)                          | Weighted spectral irradiance | Depending on participant               | <ol style="list-style-type: none"> <li>1. Removal of non-wear times <math>\geq 10</math> minutes after visual inspection and if probability score between non-wear sources <math>\geq 0.66</math></li> <li>2. Removal of single day if 20% data is missing during given day between Tuesday and Sunday</li> <li>3. Removal of participant if missing data for entire day between Tuesday and Sunday</li> </ol> | H1, H2 & H3                  |
| Subjective light exposure               | Rating – different modified H-LEA categories | Perceived light exposure     | 7                                      | <ol style="list-style-type: none"> <li>1. Removal of hours where entry is missing</li> <li>2. Exclusion of secondary light source for hourly each entry</li> </ol>                                                                                                                                                                                                                                             | H1                           |
| Chronotype                              | MCTQ                                         | Chronotype                   | 1                                      | Calculation on $MSF_{sc}$                                                                                                                                                                                                                                                                                                                                                                                      | H2                           |

740

741

**Table 5:** *Primary outcome measures*

742

## 743 References

- 744 Akerstedt, T., & Gillberg, M. (1990). Subjective and objective sleepiness in the active individual. *The*  
745 *International Journal of Neuroscience*, 52(1–2), 29–37.  
746 <https://doi.org/10.3109/00207459008994241>
- 747 Bajaj, A., Rosner, B., Lockley, S. W., & Schernhammer, E. S. (2011a). Validation of a Light  
748 Questionnaire with Real-life Photopic Illuminance Measurements: The Harvard Light Exposure  
749 Assessment Questionnaire. *Cancer Epidemiology, Biomarkers & Prevention*, 20(7), 1341–  
750 1349. <https://doi.org/10.1158/1055-9965.EPI-11-0204>
- 751 Bajaj, A., Rosner, B., Lockley, S. W., & Schernhammer, E. S. (2011b). Validation of a light  
752 questionnaire with real-life photopic illuminance measurements: The Harvard Light Exposure  
753 Assessment questionnaire. *Cancer Epidemiology, Biomarkers & Prevention: A Publication of*  
754 *the American Association for Cancer Research, Cosponsored by the American Society of*  
755 *Preventive Oncology*, 20(7), 1341–1349. <https://doi.org/10.1158/1055-9965.EPI-11-0204>
- 756 Balajadia, E., Garcia, S., Stampfli, J., Schrader, B., Guidolin, C., & Spitschan, M. (2023). Usability and  
757 Acceptability of a Corneal-Plane  $\alpha$ -Opic Light Logger in a 24-h Field Trial. *Digital Biomarkers*,  
758 139–149. <https://doi.org/10.1159/000531404>
- 759 Bates, D., Mächler, M., Bolker, B., & Walker, S. (2015). Fitting Linear Mixed-Effects Models Using  
760 **lme4**. *Journal of Statistical Software*, 67(1). <https://doi.org/10.18637/jss.v067.i01>
- 761 Bech, P. (2004). Measuring the dimensions of psychological general well-being by the WHO-5. *QoL*  
762 *Newsletter*, 32, 15–16.
- 763 Benjamini, Y., & Hochberg, Y. (1995). Controlling the False Discovery Rate: A Practical and Powerful  
764 Approach to Multiple Testing. *Journal of the Royal Statistical Society: Series B*  
765 *(Methodological)*, 57(1), 289–300. <https://doi.org/10.1111/j.2517-6161.1995.tb02031.x>
- 766 Bierman, A., Klein, T. R., & Rea, M. S. (2005). The Daysimeter: A device for measuring optical  
767 radiation as a stimulus for the human circadian system. *Measurement Science and*  
768 *Technology*, 16(11), 2292. <https://doi.org/10.1088/0957-0233/16/11/023>

- 769 Blume, C., Garbazza, C., & Spitschan, M. (2019). Effects of light on human circadian rhythms, sleep  
770 and mood. *Somnologie*, 23(3), 147–156. <https://doi.org/10.1007/s11818-019-00215-x>
- 771 Brown, L. S., St. Hilaire, M. A., McHill, A. W., Phillips, A. J. K., Barger, L. K., Sano, A., Czeisler, C. A.,  
772 Doyle III, F. J., & Klerman, E. B. (2021). A classification approach to estimating human  
773 circadian phase under circadian alignment from actigraphy and photometry data. *Journal of*  
774 *Pineal Research*, 71(1), e12745. <https://doi.org/10.1111/jpi.12745>
- 775 Brown, T. M., Brainard, G. C., Cajochen, C., Czeisler, C. A., Hanifin, J. P., Lockley, S. W., Lucas, R.  
776 J., Münch, M., O'Hagan, J. B., Peirson, S. N., Price, L. L. A., Roenneberg, T., Schlangen, L. J.  
777 M., Skene, D. J., Spitschan, M., Vetter, C., Zee, P. C., & Wright, K. P. (2022).  
778 Recommendations for daytime, evening, and nighttime indoor light exposure to best support  
779 physiology, sleep, and wakefulness in healthy adults. *PLoS Biology*, 20(3), e3001571.  
780 <https://doi.org/10.1371/journal.pbio.3001571>
- 781 Cain, S. W., McGlashan, E. M., Vidafar, P., Mustafovska, J., Curran, S. P. N., Wang, X., Mohamed,  
782 A., Kalavally, V., & Phillips, A. J. K. (2020). Evening home lighting adversely impacts the  
783 circadian system and sleep. *Scientific Reports*, 10(1), 19110. [https://doi.org/10.1038/s41598-](https://doi.org/10.1038/s41598-020-75622-4)  
784 [020-75622-4](https://doi.org/10.1038/s41598-020-75622-4)
- 785 Carney, C. E., Buysse, D. J., Ancoli-Israel, S., Edinger, J. D., Krystal, A. D., Lichstein, K. L., & Morin,  
786 C. M. (2012). The consensus sleep diary: Standardizing prospective sleep self-monitoring.  
787 *Sleep*, 35(2), 287–302. <https://doi.org/10.5665/sleep.1642>
- 788 Cheng, P., Walch, O., Huang, Y., Mayer, C., Sagong, C., Cuamatzi Castelan, A., Burgess, H. J., Roth,  
789 T., Forger, D. B., & Drake, C. L. (2021). Predicting circadian misalignment with wearable  
790 technology: Validation of wrist-worn actigraphy and photometry in night shift workers. *Sleep*,  
791 44(2), zsaa180. <https://doi.org/10.1093/sleep/zsaa180>
- 792 Cibeira et al. (2021). *Healthcare | Free Full-Text | Bright Light Therapy in Older Adults with Moderate*  
793 *to Very Severe Dementia: Immediate Effects on Behavior, Mood, and Physiological*  
794 *Parameters*. <https://www.mdpi.com/2227-9032/9/8/1065>
- 795 Didikoglu, A., Mohammadian, N., Johnson, S., Van Tongeren, M., Wright, P., Casson, A. J., Brown, T.

- 796 M., & Lucas, R. J. (2023). Associations between light exposure and sleep timing and  
797 sleepiness while awake in a sample of UK adults in everyday life. *Proceedings of the National*  
798 *Academy of Sciences*, 120(42), e2301608120. <https://doi.org/10.1073/pnas.2301608120>
- 799 Grandner, M. A., Valencia, D. Y., Seixas, A. A., Olivier, K., Gallagher, R. A., Killgore, W. D. S., Hale,  
800 L., Branas, C., & Alfonso-Miller, P. (2022). Development and Initial Validation of the  
801 Assessment of Sleep Environment (ASE): Describing and Quantifying the Impact of Subjective  
802 Environmental Factors on Sleep. *International Journal of Environmental Research and Public*  
803 *Health*, 19(20), 13599. <https://doi.org/10.3390/ijerph192013599>
- 804 Harris, P. A., Swafford, J., Serdoz, E. S., Eidenmuller, J., Delacqua, G., Jagtap, V., Taylor, R. J.,  
805 Gelbard, A., Cheng, A. C., & Duda, S. N. (2022). MyCap: A flexible and configurable platform  
806 for mobilizing the participant voice. *JAMIA Open*, 5(2), ooac047.  
807 <https://doi.org/10.1093/jamiaopen/ooac047>
- 808 Harris, P. A., Taylor, R., Minor, B. L., Elliott, V., Fernandez, M., O'Neal, L., McLeod, L., Delacqua, G.,  
809 Delacqua, F., Kirby, J., & Duda, S. N. (2019). The REDCap consortium: Building an  
810 international community of software platform partners. *Journal of Biomedical Informatics*, 95,  
811 103208. <https://doi.org/10.1016/j.jbi.2019.103208>
- 812 Harris, P. A., Taylor, R., Thielke, R., Payne, J., Gonzalez, N., & Conde, J. G. (2009). Research  
813 electronic data capture (REDCap)—A metadata-driven methodology and workflow process for  
814 providing translational research informatics support. *Journal of Biomedical Informatics*, 42(2),  
815 377–381. <https://doi.org/10.1016/j.jbi.2008.08.010>
- 816 Hartmeyer, S., & Andersen, M. (2023). Towards a framework for light-dosimetry studies: Quantification  
817 metrics. *Lighting Research & Technology*, 147715352311705.  
818 <https://doi.org/10.1177/14771535231170500>
- 819 Hartmeyer, S., Webler, F., & Andersen, M. (2022). Towards a framework for light-dosimetry studies:  
820 Methodological considerations. *Lighting Research & Technology*, 14771535221103258.  
821 <https://doi.org/10.1177/14771535221103258>
- 822 Higgins, P. A., Hornick, T. R., & Figueiro, M. G. (2010). Older adults' rest-activity and light exposure

- 823 patterns in the home setting: A methodological case study. *American Journal of Alzheimer's*  
824 *Disease and Other Dementias*, 25(4), 353–361. <https://doi.org/10.1177/1533317510363467>
- 825 Horne, J. A., & Östberg, O. (1977). Individual differences in human circadian rhythms. *Biological*  
826 *Psychology*, 5(3), 179–190. [https://doi.org/10.1016/0301-0511\(77\)90001-1](https://doi.org/10.1016/0301-0511(77)90001-1)
- 827 Hubalek, S., Brink, M., & Schierz, C. (2010). Office workers' daily exposure to light and its influence on  
828 sleep quality and mood. *Lighting Research & Technology*, 42(1), 33–50.  
829 <https://doi.org/10.1177/1477153509355632>
- 830 Lok, R., Ancoli-Israel, S., Ensrud, K. E., Redline, S., Stone, K. L., & Zeitzer, J. M. (2023). Timing of  
831 outdoor light exposure is associated with sleep-wake consolidation in community-dwelling  
832 older men. *Frontiers in Sleep*, 2, 1268379. <https://doi.org/10.3389/frsle.2023.1268379>
- 833 Lok, R., Smolders, K. C. H. J., Beersma, D. G. M., & de Kort, Y. A. W. (2018). Light, alertness, and  
834 alerting effects of white light: A literature overview. *Journal of Biological Rhythms*, 33(6), 589–  
835 601. <https://doi.org/10.1177/0748730418796443>
- 836 Lunn, R. M., Blask, D. E., Coogan, A. N., Figueiro, M. G., Gorman, M. R., Hall, J. E., Hansen, J.,  
837 Nelson, R. J., Panda, S., Smolensky, M. H., Stevens, R. G., Turek, F. W., Vermeulen, R.,  
838 Carreón, T., Caruso, C. C., Lawson, C. C., Thayer, K. A., Twery, M. J., Ewens, A. D., ... Boyd,  
839 W. A. (2017). Health consequences of electric lighting practices in the modern world: A report  
840 on the National Toxicology Program's workshop on shift work at night, artificial light at night,  
841 and circadian disruption. *The Science of the Total Environment*, 607–608, 1073–1084.  
842 <https://doi.org/10.1016/j.scitotenv.2017.07.056>
- 843 Mead, M. P., Reid, K. J., & Knutson, K. L. (2023). Night-to-night associations between light exposure  
844 and sleep health. *Journal of Sleep Research*, 32(2), e13620. <https://doi.org/10.1111/jsr.13620>
- 845 Moreno, C. R. C., Marqueze, E. C., Sargent, C., Jr, K. P. W., Ferguson, S. A., & Tucker, P. (2019).  
846 Working Time Society consensus statements: Evidence-based effects of shift work on physical  
847 and mental health. *Industrial Health*, 57(2), 139–157. <https://doi.org/10.2486/indhealth.SW-1>
- 848 Price, L. L. A., Khazova, M., & Udovičić, L. (2022). Assessment of the Light Exposures of Shift-  
849 working Nurses in London and Dortmund in Relation to Recommendations for Sleep and

- 850 Circadian Health. *Annals of Work Exposures and Health*, 66(4), 447–458.  
851 <https://doi.org/10.1093/annweh/wxab092>
- 852 Rea, M. S., Brons, J. A., & Figueiro, M. G. (2011). Measurements of Light at Night (LAN) for a Sample  
853 of Female School Teachers. *Chronobiology International*, 28(8), 673–680.  
854 <https://doi.org/10.3109/07420528.2011.602198>
- 855 Reid, K. J., Santostasi, G., Baron, K. G., Wilson, J., Kang, J., & Zee, P. C. (2014). Timing and intensity  
856 of light correlate with body weight in adults. *PLoS One*, 9(4), e92251.  
857 <https://doi.org/10.1371/journal.pone.0092251>
- 858 Roenneberg, T., Keller, L. K., Fischer, D., Matera, J. L., Vetter, C., & Winnebeck, E. C. (2015). Human  
859 activity and rest in situ. *Methods in Enzymology*, 552, 257–283.  
860 <https://doi.org/10.1016/bs.mie.2014.11.028>
- 861 Siraji, M. A., Lazar, R. R., van Duijnhoven, J., Schlangen, L. J. M., Haque, S., Kalavally, V., Vetter, C.,  
862 Glickman, G. L., Smolders, K. C. H. J., & Spitschan, M. (2023). An inventory of human light  
863 exposure behaviour. *Scientific Reports*, 13(1), 22151. <https://doi.org/10.1038/s41598-023-48241-y>
- 864
- 865 Siraji, M. A., Spitschan, M., Kalavally, V., & Haque, S. (2023). Light exposure behaviors predict mood,  
866 memory and sleep quality. *Scientific Reports*, 13(1), 12425. <https://doi.org/10.1038/s41598-023-39636-y>
- 867
- 868 Smolders, K. C. H. J., de Kort, Y. A. W., & van den Berg, S. M. (2013). Daytime light exposure and  
869 feelings of vitality: Results of a field study during regular weekdays. *Journal of Environmental  
870 Psychology*, 36, 270–279. <https://doi.org/10.1016/j.jenvp.2013.09.004>
- 871 Spitschan, M., Smolders, K., Vandendriessche, B., Bent, B., Bakker, J. P., Rodriguez-Chavez, I. R., &  
872 Vetter, C. (2022). Verification, analytical validation and clinical validation (V3) of wearable  
873 dosimeters and light loggers. *Digital Health*, 8, 20552076221144858.  
874 <https://doi.org/10.1177/20552076221144858>
- 875 Tsanas, A., Saunders, K. E. A., Bilderbeck, A. C., Palmius, N., Osipov, M., Clifford, G. D., Goodwin, G.  
876 M., & De Vos, M. (2016). Daily longitudinal self-monitoring of mood variability in bipolar

- 877 disorder and borderline personality disorder. *Journal of Affective Disorders*, 205, 225–233.  
878 <https://doi.org/10.1016/j.jad.2016.06.065>
- 879 van Duijnhoven, J., Aarts, M. P. J., Aries, M. B. C., Böhmer, M. N., & Rosemann, A. L. P. (2017).  
880 Recommendations for measuring non-image-forming effects of light: A practical method to  
881 apply on cognitive impaired and unaffected participants. *Technology and Health Care: Official  
882 Journal of the European Society for Engineering and Medicine*, 25(2), 171–186.  
883 <https://doi.org/10.3233/THC-161258>
- 884 Verriotto, J. D., Gonzalez, A., Aguilar, M. C., Parel, J.-M. A., Feuer, W. J., Smith, A. R., & Lam, B. L.  
885 (2017). New Methods for Quantification of Visual Photosensitivity Threshold and Symptoms.  
886 *Translational Vision Science & Technology*, 6(4), 18. <https://doi.org/10.1167/tvst.6.4.18>
- 887 Wams, E. J., Woelders, T., Marring, I., van Rosmalen, L., Beersma, D. G. M., Gordijn, M. C. M., & Hut,  
888 R. A. (2017). Linking Light Exposure and Subsequent Sleep: A Field Polysomnography Study  
889 in Humans. *Sleep*, 40(12). <https://doi.org/10.1093/sleep/zsx165>
- 890 Ward, E. M., Germolec, D., Kogevinas, M., McCormick, D., Vermeulen, R., Anisimov, V. N., Aronson,  
891 K. J., Bhatti, P., Cocco, P., Costa, G., Dorman, D. C., Fu, L., Garde, A. H., Guénel, P., Hansen,  
892 J., Härmä, M. I., Kawai, K., Khizkhin, E. A., Knutsson, A., ... Schubauer-Berigan, M. K. (2019).  
893 Carcinogenicity of night shift work. *The Lancet Oncology*, 20(8), 1058–1059.  
894 [https://doi.org/10.1016/S1470-2045\(19\)30455-3](https://doi.org/10.1016/S1470-2045(19)30455-3)
- 895 Webler, F. S., Spitschan, M., Foster, R. G., Andersen, M., & Peirson, S. N. (2019). What is the  
896 ‘spectral diet’ of humans? *Current Opinion in Behavioral Sciences*, 30, 80–86.  
897 <https://doi.org/10.1016/j.cobeha.2019.06.006>
- 898 Westland, S., Pan, Q., & Lee, S. (2017). A review of the effects of colour and light on non-image  
899 function in humans. *Coloration Technology*, 133(5), 349–361.  
900 <https://doi.org/10.1111/cote.12289>
- 901 Zauner, J., Udovicic, L., & Spitschan, M. (2023). *Power analysis for personal light exposure  
902 measurements and interventions* [Preprint]. In Review. [https://doi.org/10.21203/rs.3.rs-  
903 3771881/v1](https://doi.org/10.21203/rs.3.rs-3771881/v1)
